# Supplementary material
Source: PubMed Central journal article supplement (PMC10326732)
Supplement: jamaoncol-e232132-s001.pdf [file jamaoncol-e232132-s001.pdf]

**Local Protocol#EC2017/1678**

**Title:** CHEckpoint inhibition in combination with an immunoboost of External body Radiotherapy in Solid tumors: CHEERS-trial

Een bestralingsboost bij immuuntherapie.

**Coordinating Center:**

University Hospital Ghent  
Corneel Heymanslaan 10  
B-9000 Gent

**Study Coordinator or Chair:**

Prof. Dr. Piet Ost

**Lead co-investigators:**

Dr. Mathieu Spaas  
Dr. Nora Sundahl

**Co-investigators:**

*Yolande Lievens*  
*Vibeke Kruse*  
*Veerle Surmont*  
*Sylvie Rottey*  
Katrien Vandecasteele  
Lieve Brochez

**Statistician:**

Prof. Els Goetghebeur

## SCHEDULES

### A. For nivolumab 2-weekly: SBRT prior to C3; first evaluation after C5

|               | All patients |      |      |
|---------------|--------------|------|------|
|               | D -14 to -1  | C1D1 | C2D1 |
| Randomisation | •            |      |      |
| Liquid biopsy |              | •    |      |
| Fecal sample  |              | •    |      |
| CPI           |              | •    | •    |

|                        | C3D -6 | C3D -4 or -3 | C3 -1 | C3D1 | C4D1 | C5D1 | C5D +1 to 14 | Evaluation<br>(consultation after<br>imaging) |
|------------------------|--------|--------------|-------|------|------|------|--------------|-----------------------------------------------|
| <b>Arm A</b>           |        |              |       |      |      |      |              |                                               |
| Liquid biopsy          | •      |              |       | •    |      |      |              | •                                             |
| Fecal sample           |        |              |       |      |      |      |              | •                                             |
| Radiotherapy fraction* | •      | •            | •     |      |      |      |              |                                               |
| CPI                    |        |              |       | •    | •    | •    |              |                                               |
| Imaging (CT or PET-CT) |        |              |       |      |      |      | •            |                                               |
| <b>Arm B</b>           |        |              |       |      |      |      |              |                                               |
| Liquid biopsy          |        |              |       | •    |      |      |              | •                                             |
| Fecal sample           |        |              |       |      |      |      |              | •                                             |
| CPI                    |        |              |       | •    | •    | •    |              |                                               |
| Imaging (CT or PET-CT) |        |              |       |      |      |      | •            |                                               |

CPI: checkpoint inhibitor, if patient is randomized to arm A, CPI should be administered on a Tuesday or Thursday.

C: cycle; D: day

\*Radiotherapy should be administered according to the following schedule:

- If CPI is administered on a Tuesday: radiotherapy is given on Wednesday-Friday-Monday with third cycle of CPI given the day after last fraction (Tuesday)

- If CPI is administered on a Thursday: radiotherapy is given on Friday-Monday-Wednesday with third cycle of CPI given the day after last fraction (Thursday).

Changes are allowed in this schedule as long as every fraction is separated by minimally 48 hours and maximally 96 hours and 3<sup>rd</sup> cycle of CPI should be given the day after the last fraction.

**For nivolumab 4-weekly:**

**SBRT prior to C2; first evaluation after C3**

|               | All patients |      |
|---------------|--------------|------|
|               | D -14 to -1  | C1D1 |
| Randomisation | •            |      |
| Liquid biopsy |              | •    |
| Fecal sample  |              | •    |
| CPI           |              | •    |

|                        | C2D -6 | C2D -4 or -3 | C2 -1 | C2D1 | C3D1 | C3D +1 to 14 | Evaluation<br>(consultation after<br>imaging) |
|------------------------|--------|--------------|-------|------|------|--------------|-----------------------------------------------|
| <b>Arm A</b>           |        |              |       |      |      |              |                                               |
| Liquid biopsy          | •      |              |       | •    |      |              | •                                             |
| Fecal sample           |        |              |       |      |      |              | •                                             |
| Radiotherapy fraction* | •      | •            | •     |      |      |              |                                               |
| CPI                    |        |              |       | •    | •    |              |                                               |
| Imaging (CT or PET-CT) |        |              |       |      |      | •            |                                               |
| <b>Arm B</b>           |        |              |       |      |      |              |                                               |
| Liquid biopsy          |        |              |       | •    |      |              | •                                             |
| Fecal sample           |        |              |       |      |      |              | •                                             |
| CPI                    |        |              |       | •    | •    |              |                                               |
| Imaging (CT or PET-CT) |        |              |       |      |      | •            |                                               |

CPI: checkpoint inhibitor, if patient is randomized to arm A, CPI should be administered on a Tuesday or Thursday.

C: cycle; D: day

\*Radiotherapy should be administered according to the following schedule:

- If CPI is administered on a Tuesday: radiotherapy is given on Wednesday-Friday-Monday with third cycle of CPI given the day after last fraction (Tuesday)

- If CPI is administered on a Thursday: radiotherapy is given on Friday-Monday-Wednesday with third cycle of CPI given the day after last fraction (Thursday).

Changes are allowed in this schedule as long as every fraction is separated by minimally 48 hours and maximally 96 hours and 2<sup>nd</sup> cycle of CPI should be given the day after the last fraction.

**A. For pembrolizumab or atezolizumab:  
SBRT prior to C3; first evaluation after C4**

|               | All patients |      |      |
|---------------|--------------|------|------|
|               | D -14 to -1  | C1D1 | C2D1 |
| Randomisation | •            |      |      |
| Liquid biopsy |              | •    |      |
| Fecal sample  |              | •    |      |
| CPI           |              | •    | •    |

|                        | C3D -6 | C3D -4 or -3 | C3 -1 | C3D1 | C4D1 | C4D +1 to 14 | Evaluation<br>(consultation after<br>imaging) |
|------------------------|--------|--------------|-------|------|------|--------------|-----------------------------------------------|
| <b>Arm A</b>           |        |              |       |      |      |              |                                               |
| Liquid biopsy          | •      |              |       | •    |      |              | •                                             |
| Fecal sample           |        |              |       |      |      |              | •                                             |
| Radiotherapy fraction* | •      | •            | •     |      |      |              |                                               |
| CPI                    |        |              |       | •    | •    |              |                                               |
| Imaging (CT or PET-CT) |        |              |       |      |      | •            |                                               |
| <b>Arm B</b>           |        |              |       |      |      |              |                                               |
| Liquid biopsy          |        |              |       | •    |      |              | •                                             |
| Fecal sample           |        |              |       |      |      |              | •                                             |
| CPI                    |        |              |       | •    | •    |              |                                               |
| Imaging (CT or PET-CT) |        |              |       |      |      | •            |                                               |

CPI: checkpoint inhibitor, if patient is randomized to arm A, CPI should be administered on a Tuesday or Thursday.

C: cycle; D: day

\*Radiotherapy should be administered according to the following schedule:

- If CPI is administered on a Tuesday: radiotherapy is given on Wednesday-Friday-Monday with third cycle of CPI given the day after last fraction (Tuesday)

- If CPI is administered on a Thursday: radiotherapy is given on Friday-Monday-Wednesday with third cycle of CPI given the day after last fraction (Thursday).

Changes are allowed in this schedule as long as every fraction is separated by minimally 48 hours and maximally 96 hours and 3<sup>rd</sup> cycle of CPI should be given the day after the last fraction.

## TABLE OF CONTENTS

|                                                                         |    |
|-------------------------------------------------------------------------|----|
| Schedules.....                                                          | 2  |
| 1. Objectives .....                                                     | 8  |
| 1.1 Primary Objectives.....                                             | 8  |
| 1.2 Secondary Objectives .....                                          | 8  |
| 1.3 Trial end points.....                                               | 8  |
| 2. Background.....                                                      | 9  |
| Background and Rationale.....                                           | 9  |
| 3. Patient Selection.....                                               | 10 |
| 3.1 Inclusion.....                                                      | 10 |
| 3.2 Exclusion .....                                                     | 10 |
| 4. Registration Procedures .....                                        | 11 |
| 5. Therapeutic Regimens, expected toxicity, dose modifications .....    | 12 |
| 5.1 Treatment Plan .....                                                | 12 |
| 5.1.1 Treatment allocation .....                                        | 12 |
| 5.1.2 Trial treatments .....                                            | 12 |
| 5.1.3 Radiotherapy Administration .....                                 | 12 |
| 5.1.4 Dose modifications and duration of therapy .....                  | 13 |
| 5.1.5 Concomitant medications/vaccinations (allowed & prohibited) ..... | 13 |
| 6. Clinical Evaluation, Laboratory Tests, Follow-up.....                | 15 |
| 6.1 Baseline assessments .....                                          | 15 |
| 6.2 Liquid biopsies and Fecal sample .....                              | 15 |
| 6.3 Tissue sample analysis.....                                         | 15 |
| 7. Statistical Considerations .....                                     | 17 |
| 7.1 Statistical design.....                                             | 17 |
| 8. Adverse event reporting requirements.....                            | 18 |
| 8.1 Expected adverse events using SBRT .....                            | 18 |
| 8.2 Definitions for adverse event reporting.....                        | 18 |
| 8.3 Reporting procedure .....                                           | 19 |
| 9. Study Calendar.....                                                  | 20 |
| 9.1 Baseline/Pre-Study Evaluations.....                                 | 20 |
| 9.2 During Study .....                                                  | 20 |
| 9.3 Off-study and Follow-up Evaluations .....                           | 20 |

|      |                                                                        |    |
|------|------------------------------------------------------------------------|----|
| 10.4 | Summary Table.....                                                     | 21 |
| 10.  | Ethical considerations.....                                            | 24 |
| 10.1 | Patient protection .....                                               | 24 |
| 10.2 | Informed consent .....                                                 | 24 |
| 11.  | Trial Sponsorship and financing.....                                   | 25 |
| 12.  | Trial insurance .....                                                  | 25 |
| 13.  | Publication Policy.....                                                | 25 |
|      | Appendix A – Performance status criteria.....                          | 26 |
|      | Appendix B – Informed consent.....                                     | 27 |
|      | <b>Titel van de studie</b> .....                                       | 1  |
|      | <b>Opdrachtgever van de studie</b> .....                               | 1  |
|      | <b>Onderzoeksinstellingen</b> .....                                    | 1  |
|      | <b>Nummer van de studie</b> .....                                      | 1  |
|      | <b>Doel van de studie</b> .....                                        | 1  |
|      | <b>Beschrijving van de studie:</b> .....                               | 2  |
|      | <b>Wat wordt verwacht van de proefpersoon?</b> .....                   | 3  |
|      | <b>Deelname en beëindiging</b> .....                                   | 3  |
|      | <b>Procedures</b> .....                                                | 3  |
|      | <i>Procedures:</i> .....                                               | 3  |
|      | <i>Studieverloop:</i> .....                                            | 4  |
|      | <i>Studieanalyses van biologische stalen</i> .....                     | 4  |
|      | <b>Risico's en voordelen</b> .....                                     | 5  |
|      | <i>Risico's in verband met de studitherapie</i> .....                  | 5  |
|      | <i>Risico's in verband met de klinische onderzoeksprocedures</i> ..... | 5  |
|      | <i>Contraceptie, zwangerschap en borstvoeding</i> .....                | 5  |
|      | <b>Commissie voor Medische Ethiek</b> .....                            | 6  |
|      | <b>Kosten</b> .....                                                    | 6  |
|      | <b>Vergoeding</b> .....                                                | 6  |
|      | <b>Vertrouwelijkheid</b> .....                                         | 6  |
|      | <i>Algemeen</i> .....                                                  | 6  |
|      | <i>Biologische stalen die tijdens de studie worden afgenomen</i> ..... | 7  |
|      | <b>Letfels ten gevolge van deelname aan de studie</b> .....            | 8  |
|      | <b>Contactpersoon</b> .....                                            | 8  |
|      | <b>Toestemmingsformulier</b> .....                                     | 9  |

|                                                                                                             |    |
|-------------------------------------------------------------------------------------------------------------|----|
| <b>Bijlage: Aanvullende informatie over de risico's die verbonden zijn aan deelname aan de studie</b> ..... | 12 |
| <i><b>Risico's in verband met de immuuntherapie</b></i> .....                                               | 12 |
| <i><b>Risico's in verband met de radiotherapie</b></i> .....                                                | 12 |
| Appendix C – Case Report form .....                                                                         | 15 |
| References .....                                                                                            | 31 |

# 1. OBJECTIVES

## 1.1 PRIMARY OBJECTIVES

- To determine whether the addition of SBRT to maximally 3 lesions leads to a progression-free survival benefit in patients with metastatic disease of a solid tumour during checkpoint inhibitor (CPI) treatment as compared to CPI monotherapy.

## 1.2 SECONDARY OBJECTIVES

- To compare overall survival between both groups.
- To compare best overall objective response rate according to the iRecist and Recist v1.1 between both groups.
- To compare the local response according to Recist v1.1 between both groups.
- To compare adverse events and quality of life between both groups.
- To determine the effect of both treatments on the immune cells, immune markers and cell death markers in liquid biopsies during the trial.
- To determine the predictive and prognostic value of the gut microbiome.

## 1.3 TRIAL END POINTS

- Primary endpoint:
  - Progression-free survival analysed in all patients who received at least one cycle of CPIs. Progression-free survival is defined as the time from randomization to disease progression or death from any cause. Disease progression will be evaluated using systemic imaging by CT or PET-CT and will be defined according to iRecist. Imaging will occur every 3 months, or earlier if clinically indicated.
- Secondary endpoints:
  - Overall survival
  - Best objective overall response as per iRecist and Recist v1.1
  - Local control as per Recist v1.1
  - Adverse events as per Common Terminology Criteria for Adverse Events (CTCAE) v5.0
  - Quality of life as per EORTC QLQ-C30
  - Systemic responses during the trial using peripheral blood samples.
  - The predictive and prognostic value of the gut microbiome.



## 2. BACKGROUND

### BACKGROUND AND RATIONALE

Recently, CPIs have become the standard of care as a first or second line systemic treatment for patients with inoperable or metastatic non-small cell lung cancer, renal cell cancer, urothelial cancer, melanoma and head and neck cancer (1-4). Unfortunately, the majority of patients do not respond to this treatment and the overall survival is still limited. Patients who do not respond to CPIs, typically have less immunogenic tumours with low levels of tumour-infiltrating CD8+ T cells (5, 6). It is possible that in these non-responding patients, the tumour microenvironment hinders T cell infiltration and induction of an endogenous immune response.

Pre-clinical and clinical evidence indicate that radiotherapy can act as an in-situ cancer vaccine by inducing immunogenic cell death, triggering the release of tumour-derived antigens and attracting CD8+ T-cells to the tumour and hereby leading to an increase in immunogenicity. This can then trigger a – potentially systemic – anti-tumour immune response (7-10). This anti-tumour immune response can lead to tumour responses outside the irradiated regions, a phenomenon called the “abscopal” effect, which has occurred in several kinds of malignancies (11-15). Pre-clinical evidence indicates that hypofractionated radiotherapy (e.g. 3 x 8 Gy) might be ideally suited to trigger a systemic immune effect (16). Stereotactic body radiotherapy (SBRT) is an innovative technique which allows the safe administration of this hypofractionated radiotherapy with high precision and limited toxicity.

The combination of CPIs with SBRT could therefore work synergistically and lead to an improved systemic immune response, with higher response rates and longer overall survival as a result (7-9, 11). Apart from a systemic abscopal effect, clinical evidence also indicates that the combination of radiotherapy with CPIs leads to excellent local responses of irradiated tumours, denoted as the “adscopal” effect (8).

Early phase clinical trials indicate that CPIs can be combined safely with radiotherapy without excess toxicity (8, 9). In our centre, we have conducted 2 phase I trials and 1 phase II trial combining CPIs with SBRT, which have been published (17) or are currently finalizing enrolment (NCT02406183, NCT02821182, NCT02826564). Confidentially, we can disclose that we did not observe additional toxicity with the combination of CPIs with SBRT. The current project will shed light on the efficacy of the combination treatment in a randomized trial.

## 3. PATIENT SELECTION

### 3.1 INCLUSION

- Before patient registration, written informed consent must be given according to ICH/GCP and national/local regulations.
- Histologically confirmed diagnosis of a solid tumour.
- At least one extracranial tumour lesion available for radiotherapy administration.
- Patient will receive a checkpoint inhibitor per standard of care in one of the following settings (locally advanced or metastatic):
  - melanoma: 1<sup>st</sup>-3<sup>rd</sup> line nivolumab or pembrolizumab
  - renal cell carcinoma: 2<sup>nd</sup> line nivolumab
  - non-small cell lung carcinoma: 2<sup>nd</sup> or 3<sup>rd</sup> line nivolumab, atezolizumab or pembrolizumab
  - urothelial cell carcinoma: 1<sup>st</sup>-3<sup>rd</sup> line nivolumab, atezolizumab or pembrolizumab
  - head- and neck squamous cell carcinoma: 1<sup>st</sup>-2<sup>nd</sup> line pembrolizumab, 2<sup>nd</sup> line nivolumab
- Karnofsky Performance status > 60
- Age 18 years or older.

### 3.2 EXCLUSION

- Prior radiotherapy preventing treatment with SBRT.
- Prior treatment with an anti-PD-(L)1 antibody.
- Has a known additional malignancy that is progressing or requires active treatment. Exceptions include basal cell carcinoma of the skin or squamous cell carcinoma of the skin that has undergone potentially curative therapy or in situ cervical cancer or prostate cancer that has undergone potentially curative therapy and with normalized PSA.
- Uncontrolled central nervous system (CNS) metastases at baseline (controlled = previously-treated CNS metastases (surgery ± radiotherapy, radiosurgery, or gamma knife) and who meet both of the following criteria: a) are asymptomatic and b) have no requirement for steroids or enzyme-inducing anticonvulsants), and/or carcinomatous meningitis.
- Any condition requiring systemic treatment with corticosteroids (> 10 mg daily prednisone equivalent) or other immunosuppressive medication within 14 days prior to the first dose of study drug. Inhaled steroids and adrenal replacement steroid doses > 10 mg daily prednisone equivalent are permitted in the absence of active autoimmune disease.
- Has a diagnosis of immunodeficiency or history of human immunodeficiency virus (HIV), Hepatitis B or Hepatitis C infection.
- Mental condition rendering the patient unable to understand the nature, scope and possible consequences of the study.
- Patient not likely to comply with the protocol; i.e. uncooperative attitude, inability to return for follow-up visits and unlikely to complete the study.
- Contraindication for radiotherapy.
- Female subjects of childbearing potential must be willing to use an adequate method of contraception for the course of the study through 120 days after the last dose of study medication.

## 4. REGISTRATION PROCEDURES

Eligible patients will be entered on study centrally at the University Hospital Ghent by the Study Coordinator. The required forms: *Informed consent form* and *Case report form* can be found in Appendix B and C respectively. An electronic case report form is available from REDCap (<https://rtredcap.uzgent.be>). If a patient does not receive protocol therapy following registration, the patient's registration on the study may be cancelled. The Study Coordinator should be notified of cancellations as soon as possible.

Study coordinator:

Prof. Dr. Piet Ost  
Department of Radiotherapy-Oncology  
Corneel Heymanslaan 10  
B-9000 Gent

Data coordinator:

Dr. Mathieu Spaas  
Department of Radiotherapy-Oncology  
Corneel Heymanslaan 10  
B-9000 Gent

To register a patient, the following documents should be completed by the Data Coordinator and e-mailed to the Study Coordinator ([piet.ost@ugent.be](mailto:piet.ost@ugent.be)):

- Signed patient consent form
- Case Report Form
- Eligibility Screening Worksheet

The Data Coordinator will then call the Study Coordinator to verify eligibility. To complete the registration process, the Study Coordinator will

- assign a patient study number
- register the patient on the study
- call the data manager at the participating site and verbally confirm registration

## 5. THERAPEUTIC REGIMENS, EXPECTED TOXICITY, DOSE MODIFICATIONS

### 5.1 TREATMENT PLAN

#### 5.1.1 TREATMENT ALLOCATION

Patients will be randomly assigned to a treatment arm; randomization will be stratified on primary tumor histology (melanoma, renal cell carcinoma, non-small-cell carcinoma, urothelial cell carcinoma or head-and-neck squamous cell carcinoma) and on whether the patient is oligometastatic (metastases =<3 or >3). Randomly permuted blocks of variable length 2 and 4 will thus be assigned to each stratum.

$$p = 1 - \frac{N_1}{N_1 + N_2}$$

Every patient is assigned a treatment arm following the randomization-scheme.

#### 5.1.2 TRIAL TREATMENTS

All treatments described below will be initiated after randomisation.

##### **Arm A = interventional arm**

Patient receives 1/2 cycle(s) of CPI (depending on type of CPI, see pg. 2-4). Prior to the second/third cycle (cfr. pg. 2-4), stereotactic body radiotherapy to maximally 3 extracranial lesions in 3 fractions of 8 Gy, for a total dose of 24 Gy on each lesion is administered. Patient receives 3-5 cycles (cfr. pg. 2-4) of CPI in total prior to first evaluation (imaging + consultation).

##### **Arm B = control arm**

Patient receives 3-5 cycles (cfr. pg. 2-4) of CPI with subsequent first evaluation (imaging + consultation).

#### 5.1.3 RADIOTHERAPY ADMINISTRATION

A total dose of 24 Gy will be delivered in 3 fractions to maximally three extracranial tumour lesions using IMRT. Gross tumour volume (GTV) will be delineated based on clinical and imaging studies and directly expanded to a planning target volume. Radiotherapy will be prescribed according to the ICRU guidelines.

##### **Radiotherapy details**

###### **Simulation:**

All patients will receive a CT in supine position with 3 mm CT slice thickness through the tumour site. The planning simulation should cover the target and all organs at risk. A typical scan length should extend at least 10 cm superior and inferior beyond the treatment field borders. Support devices to increase patient comfort will be chosen depending on the tumour localization. Lung and liver tumour sites will be simulated with 4D-CT, taking into account breathing. The isocenter will be determined on the CT-simulator with marking of laser lines on the patient. Imaging data will be transferred to the treatment planning system. The types of organs at risk delineated depends on the localization of the metastasis.

###### **OAR definition and Target definition:**

Gross Target Volume (GTV): all visible tumour by combining iconographic and metabolic information (if available). No clinical target volume will be delineated.

Planning Target Volume (PTV): expansion from the GTV to account for organ motion and setup error. Margins depend on the site irradiated with 2 mm margins for bony lesions and 5 mm for other sites. In case of overlap between OAR and PTV exists, a PTV\_optim is created by subtracting the OAR or the planning organ at risk volume (PRV) from the PTV volume. This PTV\_optim will be used to prescribe the dose instead of the PTV.

A Planning Organ at Risk Volume (PRV) expansion of 2 mm will be added to the spinal cord, oesophagus, intestine, ... (if applicable), and dose constraints apply to this PRV. It is strongly recommended that dose constraints not be exceeded. If a dose constraint cannot be achieved due to overlap of the target with an organ at risk, the fractionation can be increased or the target coverage compromised in order to meet the constraint.

**Radiotherapy treatment planning and dose prescription:**

IMRT (static or rotational) treatment planning will depend on the localization of the lesion. Dose constraints of organs at risk will be in accordance with the recommendations from the report of the AAPM task group 101 (18). The total dose (24Gy = 80% of the maximal dose (30Gy)) will be delivered in 3 fractions and fractions will be separated >48h and <96h. Treatment will be prescribed to the periphery of the target (80% of the maximal dose), should cover 90% of the PTV) covering the PTV. In case of violation of dose constraints to the surrounding organs at risk, the prescription will be adapted accordingly.

**Radiotherapy delivery and verification:**

Treatment will be delivered with static or rotational IMRT with 6-18 MV photons of a linear accelerator using cone-beam CT set-up and on-line correction of patient's position. If multiple targets will be irradiated and the targets are more than 10 cm apart in the cranio-caudal direction, multiple isocenters are needed with a CBCT prior to every treatment for every isocenter. Patient immobilization devices can be used according to the institutional policy.

*5.1.4 DOSE MODIFICATIONS AND DURATION OF THERAPY*

CPI dose adjustments according to standard of care regimens are allowed after the first evaluation at the discretion of the investigator (e.g. nivolumab q2w to q4w). Patients may discontinue protocol therapy when unacceptable toxicity is encountered. Patients may also discontinue protocol in case of intercurrent illness which would in the judgment of the investigator affect patient safety, the ability to deliver treatment or by request of the patient.

*5.1.5 CONCOMITANT MEDICATIONS/VACCINATIONS (ALLOWED & PROHIBITED)*

Medications or vaccinations specifically prohibited in the exclusion criteria are not allowed during the ongoing trial. If there is a clinical indication for one of these or other medications or vaccinations specifically prohibited during the trial, discontinuation from trial therapy or vaccination may be required. The investigator should discuss any questions regarding this with the study coordinator. The final decision on any supportive therapy or vaccination rests with the investigator and/or the subject's primary physician.

**Acceptable Concomitant Medications:**

All treatments that the investigator considers necessary for a subject's welfare may be administered at the discretion of the investigator in keeping with the community standards of medical care. All concomitant medication will be recorded on the case report form (CRF) including all prescription, over-the-counter (OTC), herbal supplements, and IV medications and fluids. If changes occur during the trial period, documentation of drug dosage, frequency, route, and date may also be included on the CRF.

All concomitant medications received within 28 days before the first dose of trial treatment and 30 days after the last dose of trial treatment should be recorded. Concomitant medications administered after 30 days after the last dose of trial treatment should be recorded for SAEs as defined in Section 8.3.

**Prohibited Concomitant Medications:**

Subjects are prohibited from receiving the following therapies during the Screening and Treatment Phase (including retreatment for post-complete response relapse) of this trial:

- Antineoplastic systemic chemotherapy or biological therapy
- Immunotherapy not specified in this protocol
- Chemotherapy not specified in this protocol
- Radiation therapy, other than defined in the protocol
  - Note: Indications for non-study prescribed radiotherapy should always be discussed first with the study coordinator.
- Live vaccines within 30 days prior to the first dose of trial treatment and while participating in the trial. Examples of live vaccines include, but are not limited to, the following: measles, mumps, rubella, varicella/zoster, yellow fever, rabies, BCG, and typhoid vaccine.

## 6. CLINICAL EVALUATION, LABORATORY TESTS, FOLLOW-UP

### 6.1 BASELINE ASSESSMENTS

- Documentation of the patient's medical history and all medication
- Registration of baseline symptoms
- Quality of life registration
- Karnofsky performance status
- Clinical examination
- Blood draw assessing at least the following elements: complete blood count (haemoglobin, white blood cell count and formula, thrombocyte count), electrolytes (Na, K), renal function (creatinine, blood urea nitrogen), liver function (AST, ALT, GGT, alkaline phosphatase), lactate dehydrogenase and C-reactive protein.

### 6.2 LIQUID BIOPSIES AND FECAL SAMPLE

A fecal sample will be collected before start of checkpoint inhibitor treatment and at the first evaluation.

Blood samples (maximum 100 ml) will be taken from patients on the following time points:

- Arm A (= interventional arm):
  - Before first cycle of CPIs
  - Before first fraction of radiotherapy
  - Day after last fraction of radiotherapy, prior to administration of CPI
  - At every evaluation (consultation after imaging) as long as patient receives CPI
- Arm B (= control arm):
  - Before first cycle of CPIs
  - Before the second (for nivolumab 4-weekly) or third (for pembrolizumab 3-weekly or atezolizumab 3-weekly or nivolumab 2-weekly) cycle of CPIs
  - At every evaluation (consultation after imaging) as long as patient receives CPI

Using flow cytometry on the blood samples of trial patients, subsets of immune cells (see Chevolet et al for full list (19)), selected immune checkpoints (IDO, PD-1 and TIM-3) and cell death markers (e.g. HMGB1) will be identified. Cytokines (TNF $\alpha$ , MCP-1, CCL22, CXCL12, IFN $\gamma$ , IFN $\beta$ , CCL20, IP10, CXCL9, S100B and RANTES) will be measured via multiplex analysis. cfDNA will be analysed using shallow whole genome sequencing which will allow reliable non-invasive copy-number profiling, as previously demonstrated by our group (20). Also germline DNA and RNA will be analysed. Depending on the published scientific literature available at the time of data cut off, additional analyses could be performed.

### 6.3 TISSUE SAMPLE ANALYSIS

If at any point prior to or during the study, tissue samples of the primary tumour or metastatic foci were obtained from the trial patient for diagnostic purposes and stored, any remaining tissue may be retrieved from the respective pathology department. Analyses of this formalin-fixed paraffin embedded (FFPE) material will include isolation of tumour RNA and DNA, PD-L1 expression and tumour infiltrating lymphocytes (TIL).

Depending on the published scientific literature available at the time of data cut off, additional (immunohistochemical) analyses could be performed.

Tumor RNA and DNA will be isolated using the miRNAeasy FFPE kit (Qiagen) from 5 slices of 15  $\mu$ M thickness obtained from an FFPE tissue block, applying macrodissection based on histopathological evaluation of hematoxylin and eosin stained slides to select regions with high tumor cellularity, as previously demonstrated by our group (Decock et al, Oncopoint symposium 2018). As RNA is prone to degradation, RNA isolation should be performed immediately after cutting off the slices. Hence the whole paraffin-embedded tissue block will be requested. Slices of the block will be generated at the department of pathology at Ghent University, immediately before RNA isolation. The remnant material will be sent back to the original lab.



## 7. STATISTICAL CONSIDERATIONS

### 7.1 STATISTICAL DESIGN

This trial is designed to assess whether SBRT to maximum 3 lesions after 2 cycles of CPIs could prolong progression-free survival as compared to standard of care in metastatic patients. The study has a two-sided 0.05 type I error and 80 % power to detect an improvement in progression-free survival of 3 months in the intervention group as compared to the control group. Median progression-free survival for the control arm was estimated at 3.1 months. Median progression-free survival after initiation of CPIs is approximately as follows:

- 20% metastatic melanoma (1<sup>st</sup>-3<sup>rd</sup> line): 5.2 months (1, 21-24)
- 20% renal cell carcinoma (2<sup>nd</sup> line): 4.6 months (25)
- 20% non-small cell lung carcinoma (2<sup>nd</sup>-3<sup>rd</sup>line): 2.7 months (3, 26, 27)
- 25% bladder cancer (1<sup>st</sup>-3<sup>rd</sup> line): 2.2 months (28, 29)
- 15% head- and neck cancer (1<sup>st</sup>-2<sup>nd</sup> line): 2.0 months (30, 31)

We estimate to recruit 30% oligometastatic patients (defined as  $\leq 3$  metastases) and 70% non-oligometastatic (defined as  $>3$  metastases) in the trial. We hypothesize that an improved progression-free survival of 3 months will be seen. We estimated a 36 month accrual time and a 12 month follow-up time. Analysis is planned 3 months after inclusion of the last patient.

Using these assumptions and including a 5% drop out rate, the trial requires a total of 97 patients to be randomized in to two groups. Sample size calculation was performed using R version 3.4.1.

Descriptive statistics will be used to summarize patient characteristics per treatment group.

Progression-free survival will be defined as the time from randomization to disease progression (as per iRECIST using CT or PET-CT) or death from any cause. Progression-free survival will be compared between groups using the log-rank test. Kaplan-Meier estimates of 1-year progression-free survival and overall survival will be provided for each treatment group and as a post-hoc subgroup analysis based on patient characteristics described above. Median follow-up time will be derived using both complete and incomplete follow-up times. Cox proportional hazards regression will be used to provide hazard ratio estimates when assessing progression-free survival using covariates of interests. A p-value of less than 0.05 will be considered statistically significant.

For the evaluation of biomarkers on one time point, differences between groups will be tested using the Mann-Whitney U test. For the evaluation of biomarkers over time, differences between groups will be tested using the Wilcoxon signed-rank test. To evaluate correlations, Spearman correlation coefficients will be calculated. A p-value of less than 0.05 will be considered statistically significant.

All statistical analyses will be performed using SPSS 24.0 (SPSS Inc, Chicago, IL, USA).

## 8. ADVERSE EVENT REPORTING REQUIREMENTS

### 8.1 EXPECTED ADVERSE EVENTS USING SBRT

The expected adverse events are dependent on the localization of the tumour. The expected adverse events are probably temporary during or immediately after radiotherapy. Immediate or late toxicity cannot be excluded.

Toxicity depends on the localization of the tumour being irradiated. If the tumour is located in the abdomen, nausea, vomiting or an elevated urge to defecate with possibly more loose stools can occur. Radiotherapy of pelvic located tumours might result in temporary urinary or lower gastro-intestinal complaints. If the tumour is located in the lung, pneumonitis or esophagitis can occur. Depending on the distance between the tumour and the skin, temporary erythema grade 1 might be observed.

### 8.2 DEFINITIONS FOR ADVERSE EVENT REPORTING

An **Adverse Event (AE)** is defined as any untoward medical occurrence or experience in a patient or clinical investigation subject which occurs following the trial treatment regardless of the dose or causal relationship. This can include any unfavourable and unintended signs (such as rash or enlarged liver), or symptoms (such as nausea or chest pain), an abnormal laboratory finding (including blood tests, x-rays or scans) or a disease temporarily associated with the use of the protocol treatment (ICH-GCP).

An **Adverse Drug Reaction (ADR)** is defined as any response to a treatment, that is noxious and/or unexpected, related to any dose. (ICH-GCP).

Response to a **medicinal treatment** (used in the above definition) means that a causal relationship between the medicinal treatment and the adverse event is at least a reasonable possibility, i.e. the relationship cannot be ruled out.

An **Unexpected Adverse Drug Reaction** is any adverse reaction for which the nature or severity is not consistent with the applicable treatment information (ICH-GCP).

A **Serious Adverse Event (SAE)** is defined as any undesirable experience occurring to a patient, whether or not considered related to the protocol treatment. A **Serious Adverse Event (SAE)** which is considered related to the protocol treatment is defined as a **Serious Adverse Drug Reaction (SADR)**.

Adverse events and adverse drug reactions which are considered as serious are those which result in:

- ◆ death
- ◆ a life threatening event (i.e. the patient was at immediate risk of death at the time the reaction was observed)
- ◆ hospitalization or prolongation of hospitalization
- ◆ persistent or significant disability/incapacity
- ◆ a congenital anomaly/birth defect
- ◆ any other medically important condition (i.e. important adverse reactions that are not immediately life threatening or do not result in death or hospitalization but may jeopardize the patient or may require intervention to prevent one of the other outcomes listed above)

### 8.3 REPORTING PROCEDURE

Patients will be instructed by the investigator to report the occurrence of any AE. The investigator assesses and records all AEs observed during the AE reporting period from inclusion until 4 months after randomization. Special attention should be given to AEs predefined on the AE-form. Radiotherapy AEs are coded with the NCI (National Cancer Institute) CTCAE (Common Terminology Criteria for AEs) v5.0, and assigned a grade (from 1 = mild to 5 = death related to AE) as well as a relationship to trial treatment. Grade 0 = absent must be used for the absence of predefined AEs. The NCI CTCAE v5.0 (as pdf) as well as instructions on how to use the criteria can be found on [http://ctep.cancer.gov/protocolDevelopment/electronic\\_applications/ctc.htm](http://ctep.cancer.gov/protocolDevelopment/electronic_applications/ctc.htm).

Note:

- Report the highest grade observed within one period.
- Baseline symptoms will be recorded on the case report forms (CRFs) and will be followed up during treatment.
- AEs are documented by the codes according to CTCAE v5.0. If none of the codes is applicable, it exists for each of the 26 system organ classes (SOCs) the term 'others' to describe the AE. If the term 'others' is applicable, please briefly describe the AE in a comprehensive and understandable manner.
- Laboratory values will be documented as absolute values on the CRF. Out of range laboratory values occurring outside of predefined assessment times or any laboratory values not specifically asked to be assessed by the protocol should only be documented as AE if they are grade 3 or higher.
- Relationship of AEs to treatment is assessed using the following scale:
  - 1 Unrelated: The AE is clearly not related to the trial treatment. The AE is completely independent of trial treatment and/or evidence exists that the event is definitely related to another aetiology.
  - 2 Unlikely: The AE is doubtfully related to the trial treatment. Temporal association between the trial treatment and the nature of the event is such that the trial treatment is not likely to have had any reasonable association with the observed illness/event (cause and effect relationship improbable but not impossible).
  - 3 Possible: The AE may be related to the trial treatment. Less clear temporal association; other aetiologies also possible.
  - 4 Probable: The AE is likely related to the trial treatment. Clear-cut temporal association and a potential alternative aetiology are not apparent.
  - 5 Definite: The AE is clearly related to the trial treatment. Clear-cut temporal association and no other possible cause.

**Serious adverse event reporting:**

- Reporting of SAEs to the UZ Ghent Ethical Committee and the local Ethics Committee: Any SAE must be reported by faxing the completed initial report section of the SAE form within 24 hours (working days) to:

Piet Ost  
Dept. of Radiation Oncology, ingang 98  
Ghent University Hospital  
Corneel Heymanslaan 10  
B-9000 Ghent, Belgium

The SAE outcome must be reported within 2 weeks after initial report by faxing the follow-up report section. In case the SAE is reported as ongoing after 14 days, the follow-up report has to be submitted again with the final outcome. Originals of the SAE forms (both initial and follow-up report) must be sent to Piet Ost. The centres keep a copy for their own records. The local Ethics Committee (EC) must be informed by the principal investigator about local SAEs according to the ordinance on clinical trials of therapeutic products (OClin) and local regulations for Belgian centres or according to the European Union Clinical Directive 2001/20/EC (if applicable) and/or national law for foreign centres.

## 9. STUDY CALENDAR

### 9.1 BASELINE/PRE-STUDY EVALUATIONS

- Documentation of the patient's medical history and all medication
- Registration of baseline symptoms/toxicity and quality of life
- Karnofsky Performance status
- Clinical examination
- Blood draw for white blood cell count

Baseline evaluations are to be conducted within 2 weeks prior to start of checkpoint inhibitors.

### 9.2 DURING STUDY

- Registration of symptoms before first cycle of checkpoint inhibitors, at start of radiotherapy and at end of radiotherapy (if applicable) and at least every 4 weeks until 4 months after randomization. Toxicity will be assessed using the Common Terminology Criteria for Adverse Events (CTCAE) version 5.0.
- Quality of life will be assessed at baseline, at first evaluation and every 6 months thereafter. Quality of life will be assessed using the QLQ-C30 questionnaire.
- A fecal sample will be obtained prior to start of checkpoint inhibitor treatment and at the first evaluation.
- Blood samples (EDTA and serum) for immunological analysis will be obtained prior to start of checkpoint inhibitors, before first fraction (Arm A), before the second/third cycle of CPIs (cfr. pg. 2-4) and at every evaluation (consultation after imaging) as long as patient receives CPI.
- Patients will be followed up until disease progression defined as per iRecist.

### 9.3 OFF-STUDY AND FOLLOW-UP EVALUATIONS

- Once a subject experiences confirmed disease progression, the subject moves into the survival follow-up phase and should be contacted by telephone every 12 weeks to assess for survival status until death, withdrawal of consent or the end of the study, whichever occurs first.
- Monitoring of progression and survival.

10.4 SUMMARY TABLE

A. For nivolumab 2-weekly: SBRT prior to C3; first evaluation after C5

|                                              | All patients                           |             |      |      |
|----------------------------------------------|----------------------------------------|-------------|------|------|
|                                              | Pre-study                              | D -14 to -1 | C1D1 | C2D1 |
| Informed consent                             | •                                      | •           |      |      |
| Demographics, medical Hx, performance status | •                                      |             |      |      |
| Imaging (CT or PET-CT)                       | • (max 4 weeks prior to randomisation) |             |      |      |
| Randomisation                                |                                        | •           |      |      |
| Fecal sample                                 |                                        |             | •    |      |
| Liquid biopsy                                |                                        |             | •    |      |
| CPI                                          |                                        |             | •    | •    |
| AE                                           |                                        |             | •    | •    |
| QoL                                          |                                        |             | •    |      |

|                        | C3D -6 | C3D -4 or -3 | C3D -1 | C3D1 | C4D1 | C5D1 | C5D +1 to 14 | Evaluation (consultation after imaging)               |
|------------------------|--------|--------------|--------|------|------|------|--------------|-------------------------------------------------------|
| <b>Arm A</b>           |        |              |        |      |      |      |              |                                                       |
| Liquid biopsy          | •      |              |        | •    |      |      |              | •                                                     |
| Fecal sample           |        |              |        |      |      |      |              | •                                                     |
| Radiotherapy fraction* | •      | •            | •      |      |      |      |              |                                                       |
| CPI                    |        |              |        | •    | •    | •    |              |                                                       |
| AE                     | •      |              |        | •    | •    | •    | •            | • (until 4 months after randomization)                |
| QoL                    |        |              |        |      |      |      |              | • (at first evaluation and every 6 months thereafter) |
| Imaging (CT or PET-CT) |        |              |        |      |      |      | •            |                                                       |
| <b>Arm B</b>           |        |              |        |      |      |      |              |                                                       |
| Liquid biopsy          |        |              |        | •    |      |      |              | •                                                     |
| Fecal sample           |        |              |        |      |      |      |              | •                                                     |
| CPI                    |        |              |        | •    | •    | •    |              |                                                       |
| Imaging (CT or PET-CT) |        |              |        |      |      |      | •            |                                                       |
| AE                     |        |              |        | •    | •    | •    | •            | • (until 4 months after randomization)                |
| QoL                    |        |              |        |      |      |      |              | • (at first evaluation and every 6 months thereafter) |

**B. For nivolumab 4-weekly; SBRT prior to C2; first evaluation after C3**

|                                              | All patients                           |             |      |        |              |        |      |      |              |                                                       |
|----------------------------------------------|----------------------------------------|-------------|------|--------|--------------|--------|------|------|--------------|-------------------------------------------------------|
|                                              | Pre-study                              | D -14 to -1 | C1D1 | C2D -6 | C2D -4 or -3 | C2D -1 | C2D1 | C3D1 | C3D +1 to 14 | Evaluation (consultation after imaging)               |
| Informed consent                             | •                                      | •           |      |        |              |        |      |      |              |                                                       |
| Demographics, medical Hx, performance status | •                                      |             |      |        |              |        |      |      |              |                                                       |
| Imaging (CT or PET-CT)                       | • (max 4 weeks prior to randomisation) |             |      |        |              |        |      |      |              |                                                       |
| Randomisation                                |                                        | •           |      |        |              |        |      |      |              |                                                       |
| Fecal sample                                 |                                        |             |      |        |              |        |      |      |              | •                                                     |
| Liquid biopsy                                |                                        |             |      |        |              |        |      |      |              | •                                                     |
| CPI                                          |                                        |             |      |        |              |        |      |      |              | •                                                     |
| AE                                           |                                        |             |      |        |              |        |      |      |              | •                                                     |
| QoL                                          |                                        |             |      |        |              |        |      |      |              | •                                                     |
| <b>Arm A</b>                                 |                                        |             |      |        |              |        |      |      |              |                                                       |
| Liquid biopsy                                |                                        |             |      | •      |              |        | •    |      |              | •                                                     |
| Fecal sample                                 |                                        |             |      |        |              |        |      |      |              | •                                                     |
| Radiotherapy fraction*                       |                                        |             |      | •      | •            | •      |      |      |              |                                                       |
| CPI                                          |                                        |             |      |        |              |        | •    | •    |              |                                                       |
| AE                                           |                                        |             |      | •      |              |        | •    | •    | •            | • (until 4 months after randomization)                |
| QoL                                          |                                        |             |      |        |              |        |      |      |              | • (at first evaluation and every 6 months thereafter) |
| Imaging (CT or PET-CT)                       |                                        |             |      |        |              |        |      |      | •            |                                                       |
| <b>Arm B</b>                                 |                                        |             |      |        |              |        |      |      |              |                                                       |
| Liquid biopsy                                |                                        |             |      |        |              |        | •    |      |              | •                                                     |
| Fecal sample                                 |                                        |             |      |        |              |        |      |      |              | •                                                     |
| CPI                                          |                                        |             |      |        |              |        | •    | •    |              |                                                       |
| Imaging (CT or PET-CT)                       |                                        |             |      |        |              |        |      |      | •            |                                                       |
| AE                                           |                                        |             |      |        |              |        | •    | •    | •            | • (until 4 months after randomization)                |
| QoL                                          |                                        |             |      |        |              |        |      |      |              | • (at first evaluation and every 6 months thereafter) |

**C. For pembrolizumab or atezolizumab 3-weekly: SBRT prior to C3; first evaluation after C4**

|                                              | All patients                           |             |      |      |        |              |        |      |      |              |                                                       |
|----------------------------------------------|----------------------------------------|-------------|------|------|--------|--------------|--------|------|------|--------------|-------------------------------------------------------|
|                                              | Pre-study                              | D -14 to -1 | C1D1 | C2D1 | C3D -6 | C3D -4 or -3 | C3D -1 | C3D1 | C4D1 | C4D +1 to 14 | Evaluation (consultation after imaging)               |
| Informed consent                             | •                                      | •           |      |      |        |              |        |      |      |              |                                                       |
| Demographics, medical Hx, performance status | •                                      |             |      |      |        |              |        |      |      |              |                                                       |
| Imaging (CT or PET-CT)                       | • (max 4 weeks prior to randomisation) |             |      |      |        |              |        |      |      |              |                                                       |
| Randomisation                                |                                        | •           |      |      |        |              |        |      |      |              |                                                       |
| Fecal sample                                 |                                        |             | •    |      |        |              |        |      |      |              |                                                       |
| Liquid biopsy                                |                                        |             | •    |      |        |              |        |      |      |              |                                                       |
| CPI                                          |                                        |             | •    | •    |        |              |        |      |      |              |                                                       |
| AE                                           |                                        |             | •    | •    |        |              |        |      |      |              |                                                       |
| QoL                                          |                                        |             | •    | •    |        |              |        |      |      |              |                                                       |
| <b>Arm A</b>                                 |                                        |             |      |      |        |              |        |      |      |              |                                                       |
| Liquid biopsy                                |                                        |             |      |      | •      |              |        | •    |      |              | •                                                     |
| Fecal sample                                 |                                        |             |      |      |        |              |        |      |      |              | •                                                     |
| Radiotherapy fraction*                       |                                        |             |      |      | •      | •            | •      |      |      |              |                                                       |
| CPI                                          |                                        |             |      |      |        |              | •      | •    |      |              |                                                       |
| AE                                           |                                        |             |      |      | •      |              | •      | •    |      | •            | • (until 4 months after randomization)                |
| QoL                                          |                                        |             |      |      |        |              |        |      |      |              | • (at first evaluation and every 6 months thereafter) |
| Imaging (CT or PET-CT)                       |                                        |             |      |      |        |              |        |      |      | •            |                                                       |
| <b>Arm B</b>                                 |                                        |             |      |      |        |              |        |      |      |              |                                                       |
| Liquid biopsy                                |                                        |             |      |      |        |              |        | •    |      |              | •                                                     |
| Fecal sample                                 |                                        |             |      |      |        |              |        |      |      |              | •                                                     |
| CPI                                          |                                        |             |      |      |        |              | •      | •    |      |              |                                                       |
| Imaging (CT or PET-CT)                       |                                        |             |      |      |        |              |        |      |      | •            |                                                       |
| AE                                           |                                        |             |      |      |        |              | •      | •    |      | •            | • (until 4 months after randomization)                |
| QoL                                          |                                        |             |      |      |        |              |        |      |      |              | • (at first evaluation and every 6 months thereafter) |

## 10. ETHICAL CONSIDERATIONS

### 10.1 PATIENT PROTECTION

This trial will be conducted in accordance with the protocol, current ICH-GCP guidelines and applicable law(s).

Good Clinical Practice (GCP) is an international ethical and scientific quality standard for designing, conducting, recording and reporting trials that involve the participation of human subjects. Compliance with this standard provides public assurance that the rights, safety and well-being of trial subjects are protected, consistent with the principles that have their origin in the Declaration of Helsinki, and that the clinical trial data are credible.

This trial can only be undertaken after full approval of the protocol and addenda has been obtained from the IEC/IRB. This document must be dated and clearly identify the protocol, amendments (if any), the informed consent form and any applicable recruiting materials and subject compensation programs approved.

During the trial, the following documents will be sent to the IEC/IRB for their review:

- reports of adverse events that are serious, unexpected and associated with the investigational drug
- all protocol amendments and revised informed consent form (if any).

Amendments should not be implemented without prior review and documented approval / favourable opinion from the IEC/IRB except when necessary to eliminate an immediate hazard to trial subjects or when the change involves only logistical or administrative aspects of the trial.

Reports on, and reviews of the trial and its progress will be submitted to the IEC/IRB by the investigator at intervals stipulated in their guidelines.

At the end of the trial, the investigator will notify the IEC/IRB about the trial completion.

### 10.2 INFORMED CONSENT

Prior to entry in the trial, the investigator must explain to potential subjects or their legal representatives the trial and the implication of participation. Subjects will be informed that their participation is voluntary and that they may withdraw consent to participate at any time. Participating subjects will be told that their records may be accessed by competent authorities and by authorized persons without violating the confidentiality of the subject, to the extent permitted by the applicable law(s) and/or regulations. By signing the Informed Consent Form (ICF), the subjects or legally acceptable representatives are authorizing such access.

After this explanation and before entry to the trial, written, dated and signed informed consent should be obtained from the subject or legally acceptable representative. The ICF should be provided in a language sufficiently understood by the subject. Subjects must be given the opportunity to ask questions.

The subject or legally acceptable representative will be given sufficient time to read the ICF and to ask additional questions. After this explanation and before entry to the trial, consent should be appropriately recorded by means of either the subject's or his/her legal representative's dated signature or the signature of



an independent witness who certifies the subject's consent in writing. After having obtained the consent, a copy of the ICF must be given to the subject.

In case the subject or legally acceptable representative is unable to read, an impartial witness must attest the informed consent.

Subjects who are unable to comprehend the information provided or paediatric subjects can only be enrolled after consent of a legally acceptable representative.

## 11. TRIAL SPONSORSHIP AND FINANCING

Trial sponsor:

Piet Ost  
Dept. of Radiation Oncology, ingang 98  
Ghent University Hospital  
Corneel Heymanslaan 10  
B-9000 Ghent, Belgium

## 12. TRIAL INSURANCE

For this study a “no fault” insurance will be taken by the Ghent University Hospital.

## 13. PUBLICATION POLICY

Data will not be released under any form without permission of the writing committee. The writing committee consists of the investigators named in this document. All publications and presentations of the study results will be authorized by the writing committee. The members of the writing committee will appoint the number and kind of publications and the ranking of the co-authors, based on individual contribution, merits and scientific career necessities. It is the responsibility of the first author(s) to submit a draft manuscript within reasonable timelines after the study has been closed. The approved manuscript/s will be sent to a major scientific journal.

## APPENDIX A – PERFORMANCE STATUS CRITERIA

| ECOG Performance Status Scale |                                                                                                                                                                                                | Karnofsky Performance Scale |                                                                                |
|-------------------------------|------------------------------------------------------------------------------------------------------------------------------------------------------------------------------------------------|-----------------------------|--------------------------------------------------------------------------------|
| Grade                         | Descriptions                                                                                                                                                                                   | Percent                     | Description                                                                    |
| 0                             | Normal activity. Fully active, able to carry on all pre-disease performance without restriction.                                                                                               | 100                         | Normal, no complaints, no evidence of disease.                                 |
|                               |                                                                                                                                                                                                | 90                          | Able to carry on normal activity; minor signs or symptoms of disease.          |
| 1                             | Symptoms, but ambulatory. Restricted in physically strenuous activity, but ambulatory and able to carry out work of a light or sedentary nature ( <i>e.g.</i> , light housework, office work). | 80                          | Normal activity with effort; some signs or symptoms of disease.                |
|                               |                                                                                                                                                                                                | 70                          | Cares for self, unable to carry on normal activity or to do active work.       |
| 2                             | In bed <50% of the time. Ambulatory and capable of all self-care, but unable to carry out any work activities. Up and about more than 50% of waking hours.                                     | 60                          | Requires occasional assistance, but is able to care for most of his/her needs. |
|                               |                                                                                                                                                                                                | 50                          | Requires considerable assistance and frequent medical care.                    |
| 3                             | In bed >50% of the time. Capable of only limited self-care, confined to bed or chair more than 50% of waking hours.                                                                            | 40                          | Disabled, requires special care and assistance.                                |
|                               |                                                                                                                                                                                                | 30                          | Severely disabled, hospitalization indicated. Death not imminent.              |
| 4                             | 100% bedridden. Completely disabled. Cannot carry on any self-care. Totally confined to bed or chair.                                                                                          | 20                          | Very sick, hospitalization indicated. Death not imminent.                      |
|                               |                                                                                                                                                                                                | 10                          | Moribund, fatal processes progressing rapidly.                                 |
| 5                             | Dead.                                                                                                                                                                                          | 0                           | Dead.                                                                          |

## APPENDIX B – INFORMED CONSENT

## Informatiebrief voor de deelnemers aan proeven

### Titel van de studie

Een bestralingsboost bij immuuntherapie.

Officiële titel: CHEckpoint inhibition in combination with an immunoboost of External body Radiotherapy in Solid tumors: CHEERS-trial

### Opdrachtgever van de studie

Universitair Ziekenhuis Gent  
C. Heymanslaan 10  
B-9000 Gent

### Onderzoeksinstellingen

- Universitair Ziekenhuis Gent  
C. Heymanslaan 10  
B-9000 Gent  
Lokale arts-onderzoeker: Prof. Dr. Piet Ost
- Algemeen Ziekenhuis Sint-Lucas  
Groenebriel 1  
B-9000 Gent  
Lokale arts-onderzoeker: Dr. Vincent Renard
- Algemeen Ziekenhuis Sint-Lucas  
Sint-Lucaslaan 29  
B-8310 Brugge  
Lokale arts-onderzoeker: Dr. Daan De Maeseneer
- GasthuisZusters Antwerpen  
Oosterveldlaan 22  
B-2610 Wilrijk  
Lokale arts-onderzoeker: Prof. Dr. Piet Dirix
- Instituut Jules Bordet  
Waterloolaan 121  
B-1000 Brussel  
Lokale arts-onderzoeker: Prof. Dr. Dirk Van Gestel

### Nummer van de studie

EC2017/1678

### Doel van de studie

Men heeft u gevraagd om deel te nemen aan een klinische studie.

Het doel van de huidige studie is om het effect van immuuntherapie te versterken door dit te combineren met stereotactische radiotherapie op maximaal 3 uitzaaiingen. Deze vorm van radiotherapie laat ons toe om heel doelgericht de tumor te bestralen met een minimaal effect op de gezonde weefsels. Recent werd tevens aangetoond dat deze vorm van bestraling ook in staat zou zijn het eigen afweersysteem te activeren om de tumor aan te vallen. Door de combinatie van stereotactische radiotherapie met

immuuntherapie verwachten we een toegenomen immuunrespons tegen de tumor. Dit dient echter nog bewezen te worden bij de mens in weloverwogen studies; deze studie maakt daar onderdeel van uit.

De combinatie immuuntherapie met radiotherapie werd reeds bestudeerd en wordt als veilig beschouwd. Dit onderzoek wil nagaan of het toevoegen van radiotherapie zorgt voor een betere overleving bij de patiënt in vergelijking met geen radiotherapie.

## Beschrijving van de studie:

In deze studie worden 2 behandelingen vergeleken:

- De eerste groep is de bestralings-groep. Hierin wordt standaard immuuntherapie gecombineerd met stereotactische bestraling van maximaal 3 letsels. Indien u nivolumab 4-wekelijks ontvangt, zal de radiotherapie plaatsvinden net voor de tweede cyclus immuuntherapie. Indien u nivolumab 2-wekelijks ontvangt of pembrolizumab 3-wekelijks of atezolizumab 3-wekelijks, zal de radiotherapie plaatsvinden net voor de derde cyclus immuuntherapie.
- De tweede groep is de controlegroep. Hierin wordt enkel standaard immuuntherapie toegediend, zonder bestraling.

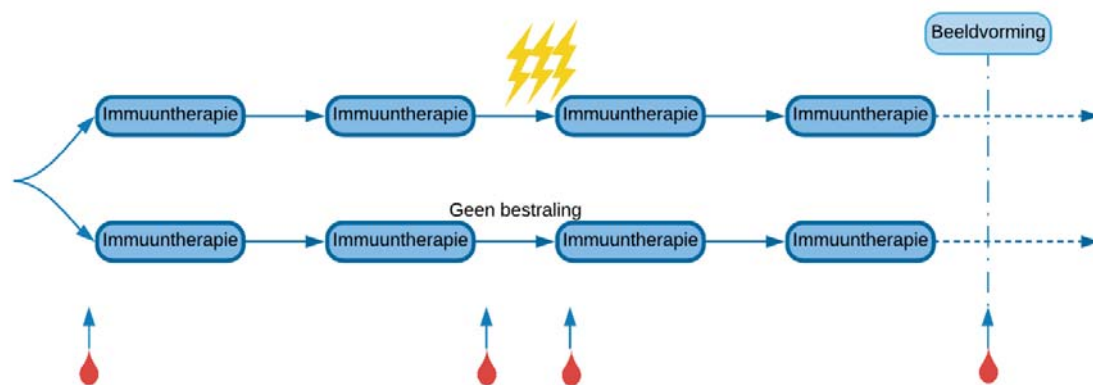

Bij het begin van de studie wordt u gerandomiseerd om een van beide behandelingen te krijgen. Dit betekent dat de computer beslist of u zal bestraald worden of niet.

Indien u in de controlegroep komt, dan ontvangt u immuuntherapie, wat u ook zou ontvangen mocht u niet deelnemen aan de studie. Indien u in de bestralingsgroep komt, dan zullen maximaal 3 letsels bestraald worden net voor de tweede of derde maal immuuntherapie (afhankelijk van het type immuuntherapie). Voor de start van de bestraling dient eerst een CT-simulatie plaats te vinden. Tijdens deze CT-simulatie worden beelden genomen van de locaties die bestraald zullen worden en worden lijntjes afgetekend op de huid (die na verloop van tijd vanzelf vervagen). Dit duurt ongeveer een 30-tal minuten.

Nadien vindt de bestraling plaats. In totaal zal u 3 keer bestraald worden (om de andere dag), telkens op maximaal 3 letsels.

In het kader van de studie zal bij start aan u een stoelgangsstaal gevraagd worden, alsook bij het eerste evaluatiemoment. Ook zal in het kader van de studie op enkele tijdstippen (zowel in de controlegroep als in de bestralingsgroep) extra buizen bloed afgenomen worden (maximaal 100 ml), met als doel het afweersysteem in het bloed te analyseren. Dit is op de volgende tijdstippen:

- Voor de eerste maal immuuntherapie
- Voor de eerste bestraling (enkel indien u bestraald wordt)
- Voor de tweede of derde maal immuuntherapie

- Bij ieder evaluatiegesprek

Indien er bij u in het verleden of in de toekomst tumorweefsel werd/wordt weggenomen, wensen wij een deel van dit weefsel te analyseren voor wetenschappelijk onderzoek. Indien uw weefsel in een ander ziekenhuis werd opgeslagen, wensen wij dit mogelijks op te vragen in dit ziekenhuis. Er wordt voor dit onderzoek geen extra weefsel weggenomen en er wordt niet afgeweken van de routine diagnostiek.

Na de eerste beeldvorming wordt uw behandeling gegeven zoals dit ook het geval zou zijn mocht u niet deelnemen aan de studie.

De verwachte totale duur van de studie is 4 maanden.

Er zullen in totaal 97 personen aan deze studie deelnemen.

## Wat wordt verwacht van de proefpersoon?

Voor het welslagen van de studie, is het uitermate belangrijk dat u volledig meewerkt met de arts en dat u zijn/haar instructies nauwlettend opvolgt.

## Deelname en beëindiging

De deelname aan deze studie vindt plaats op vrijwillige basis.

Deelname aan deze studie brengt voor u waarschijnlijk geen onmiddellijk therapeutisch voordeel. Uw deelname in de studie kan wel helpen om in de toekomst patiënten beter te kunnen helpen.

U kan weigeren om deel te nemen aan de studie, en u kunt zich op elk ogenblik terugtrekken uit de studie zonder dat u hiervoor een reden moet opgeven en zonder dat dit op enigerlei wijze een invloed zal hebben op uw verdere relatie en/of behandeling met de onderzoeker of de behandelende arts.

Het is mogelijk dat de arts-onderzoeker uw deelname aan de studie stopzet omdat u zwanger bent, omdat hij/zij van mening is dat dit beter is voor uw gezondheid of omdat hij/zij vaststelt dat u zich niet aan de voorschriften voor deelname houdt.

Als u deelneemt, wordt u gevraagd het toestemmingsformulier te tekenen. Als u de studie voortijdig verlaat, zal u worden gevraagd om naar het studiecentrum te komen voor een laatste evaluatie.

## Procedures

### **Procedures:**

- Indien u in de **bestralings-groep** wordt gerandomiseerd:
  - Dan zal op vooraf bepaalde tijdstippen extra bloed afgenomen worden. Telkens zo'n 100 ml.
  - Een CT-simulatie zal plaatsvinden om de bestraling te plannen. Een simulatie van de bestraling houdt in dat men een CT-scan zal nemen van u op de dienst radiotherapie. Soms dient men een contrastvloeistof toe via een infuus om bloedvaten en tumoren beter te kunnen zien. Vervolgens worden lijntjes afgetekend op de huid om u telkens goed te kunnen positioneren; deze gaan vanzelf na verloop van tijd verdwijnen. Soms dient een plastic 'masker' gemaakt te worden om het lichaam zeer exact te positioneren op de tafel. Dit duurt ongeveer een 30-tal minuten.
  - Vervolgens vindt 3 maal bestraling plaats (net voor de derde maal immuuntherapie indien u pembrolizumab 3-wekelijks of atezolizumab 3-wekelijks of nivolumab 2-wekelijks ontvangt; of net voor de tweede maal

immuuntherapie indien u nivolumab 4-wekelijks ontvangt). Telkens van maximaal 3 letsels. De bedoeling van bestraling, ook gekend als radiotherapie, is om zeer precies stralen toe te dienen aan de tumoren en gezond weefsel rond het letsel te sparen. Dit gebeurt met hoge nauwkeurigheid. De bestraling zelf duurt ongeveer 15 min per letsel.

- Indien u in de **controle-groep** wordt gerandomiseerd:
  - Dan zal op vooraf bepaalde tijdstippen extra bloed afgenomen worden. Telkens zo'n 100 ml.

### **Studieverloop:**

De studieverantwoordelijke zal aanduiden wat voor u van toepassing is:

#### **Nivolumab 2-wekelijks**

Bestralingsgroep:

|                               |                   |             |               |             |                   |              |                               |
|-------------------------------|-------------------|-------------|---------------|-------------|-------------------|--------------|-------------------------------|
| Bloedafname + stoelgangsstaal | 2x immuuntherapie | Bloedafname | 3x bestraling | Bloedafname | 3x immuuntherapie | Beeldvorming | Bloedafname + stoelgangsstaal |
|-------------------------------|-------------------|-------------|---------------|-------------|-------------------|--------------|-------------------------------|

Controlegroep:

|                               |                   |                 |  |             |                   |              |                               |
|-------------------------------|-------------------|-----------------|--|-------------|-------------------|--------------|-------------------------------|
| Bloedafname + stoelgangsstaal | 2x immuuntherapie | Geen bestraling |  | Bloedafname | 3x immuuntherapie | Beeldvorming | Bloedafname + stoelgangsstaal |
|-------------------------------|-------------------|-----------------|--|-------------|-------------------|--------------|-------------------------------|

#### **Nivolumab 4-wekelijks**

Bestralingsgroep:

|                               |                   |             |               |             |                   |              |                               |
|-------------------------------|-------------------|-------------|---------------|-------------|-------------------|--------------|-------------------------------|
| Bloedafname + stoelgangsstaal | 1x immuuntherapie | Bloedafname | 3x bestraling | Bloedafname | 2x immuuntherapie | Beeldvorming | Bloedafname + stoelgangsstaal |
|-------------------------------|-------------------|-------------|---------------|-------------|-------------------|--------------|-------------------------------|

Controlegroep:

|                               |                   |                 |  |             |                   |              |                               |
|-------------------------------|-------------------|-----------------|--|-------------|-------------------|--------------|-------------------------------|
| Bloedafname + stoelgangsstaal | 1x immuuntherapie | Geen bestraling |  | Bloedafname | 2x immuuntherapie | Beeldvorming | Bloedafname + stoelgangsstaal |
|-------------------------------|-------------------|-----------------|--|-------------|-------------------|--------------|-------------------------------|

#### **Pembrolizumab 3-wekelijks of atezolizumab 3-wekelijks**

Bestralingsgroep:

|                               |                   |             |               |             |                   |              |                               |
|-------------------------------|-------------------|-------------|---------------|-------------|-------------------|--------------|-------------------------------|
| Bloedafname + stoelgangsstaal | 2x immuuntherapie | Bloedafname | 3x bestraling | Bloedafname | 2x immuuntherapie | Beeldvorming | Bloedafname + stoelgangsstaal |
|-------------------------------|-------------------|-------------|---------------|-------------|-------------------|--------------|-------------------------------|

Controlegroep:

|                               |                   |                 |  |             |                   |              |                               |
|-------------------------------|-------------------|-----------------|--|-------------|-------------------|--------------|-------------------------------|
| Bloedafname + stoelgangsstaal | 2x immuuntherapie | Geen bestraling |  | Bloedafname | 2x immuuntherapie | Beeldvorming | Bloedafname + stoelgangsstaal |
|-------------------------------|-------------------|-----------------|--|-------------|-------------------|--------------|-------------------------------|

Grijze vakjes: extra voor de studie.

Witte vakjes: zou ook plaatsvinden indien u niet deelneemt aan de studie.

### **Studieanalyses van biologische stalen**

We trachten met dit wetenschappelijk onderzoek aan de hand van bloedstalen voor elke patiënt de biologische eigenschappen van zijn/haar kanker zo goed mogelijk in kaart te brengen, om zo inzicht te verkrijgen in het te verwachten ziekteverloop en om in de toekomst de meest geschikte behandeling te kunnen instellen. Deze zogenaamde 'precisie-geneeskunde', waarbij voor elke kankerpatiënt een behandeling op maat wordt opgestart op basis van de biologische eigenschappen van zijn/haar kanker, is veelbelovend maar staat nog in zijn kinderschoenen. Ons onderzoek wil bijdragen tot het tot stand brengen van precisie-geneeskunde.

Ten eerste trachten we in het bloed en in de stoelgang de wisselwerking tussen het immuunsysteem en de kankercellen in kaart te brengen. Onder andere het opsporen en analyseren van cellen betrokken bij de afweer (bv. witte bloedcellen) en de stoffen die zij produceren is hierbij van belang. Ook toont steeds meer onderzoek aan dat bacteriën in de darm een mogelijke invloed hebben op immuniteit. Door deze verschillende elementen te onderzoeken bij de twee behandelingsgroepen, hopen we verdere inzichten te verkrijgen in de manier waarop het evenwicht tussen kanker en afweer wordt beïnvloed door de combinatie van immuuntherapie met radiotherapie.

Een tweede deel van de studie zal zich richten op het onderzoek naar genetisch materiaal, met name DNA en RNA afkomstig van de tumor, in het bloed en de aanwezigheid ervan in tumorweefsel.

## **Risico's en voordelen**

Deelname aan deze studie brengt voor u mogelijks geen onmiddellijk therapeutisch voordeel.

### ***Risico's in verband met de studietherapie***

Het moet duidelijk gesteld worden dat u onafhankelijk van deelname aan deze studie een patiënt bent bij wie door zijn/haar behandelend arts immuuntherapie zal opgestart worden. Bijwerkingen en eventuele gevolgen van deze therapie dient u met uw behandelend arts te bespreken.

Indien u meedoet aan de studie, dan is er 50% kans dat u bestraald zal worden. De te verwachten bijwerkingen van een bestraling zullen tijdens of kort na de bestraling plaatsvinden en tijdelijk van aard zijn. Deze bijwerkingen zijn afhankelijk van de plaats van de tumoren die bestraald wordt. Uw behandelende radiotherapeut zal u hierover meer inlichtingen geven. Indien de tumor zich in de buik bevindt, kan er tijdelijk misselijkheid en braken optreden of een verhoogde stoelgangsdwang met mogelijks een lossere stoelgangspatroon. Indien de tumor zich in de long bevindt, kan er mogelijks een longontsteking ontstaan. Een uitgebreidere bespreking van de ongewenste bijwerkingen kan u terugvinden in bijlage (pagina 12-14).

U hebt het recht op elk ogenblik vragen te stellen over de mogelijke en/of gekende risico's van deze studie. Als er in het verloop van de studie gegevens aan het licht komen die een invloed zouden kunnen hebben op uw bereidheid om te blijven deelnemen aan deze studie, zult u daarvan op de hoogte worden gebracht.

### ***Risico's in verband met de klinische onderzoeksprocedures***

De bloedafname (ca. 100 ml bloed), die nodig is voor de analyse van de immuunrespons, kan (in zeldzame gevallen) pijn, bloedingen, bloeduitstortingen of een lokale infectie op de plek van bloedafname veroorzaken. Ook kunnen sommige deelnemers zich duizelig voelen of flauwvallen tijdens de afname. Het personeel dat de bloedafname uitvoert, zal alles in het werk stellen om deze ongemakken te beperken.

### ***Contraceptie, zwangerschap en borstvoeding***

De gevolgen van de combinatie van immuuntherapie met radiotherapie voor het ongeboren kind of voor de zuigeling zijn niet volledig gekend. U mag daarom niet deelnemen aan deze studie als u zwanger bent, zwanger wenst te worden of borstvoeding geeft.



Indien u kiest om aan deze studie deel te nemen, dient u gebruik te maken van één van de erkende contraceptiemethoden (om te voorkomen dat u zwanger wordt). Uw arts zal met u de verschillende doeltreffende opties bespreken.

## **Commissie voor Medische Ethiek**

Deze studie werd goedgekeurd door een onafhankelijke Commissie voor Medische Ethiek verbonden aan dit ziekenhuis en UGent, na raadpleging van alle ethische commissies van elk Belgisch centrum waar de studie zal worden uitgevoerd, en wordt uitgevoerd volgens de richtlijnen voor de goede klinische praktijk (ICH/GCP) en de verklaring van Helsinki opgesteld ter bescherming van mensen deelnemend aan klinische studies. In geen geval dient u de goedkeuring door de Commissie voor Medische Ethiek te beschouwen als een aanzet tot deelname aan deze studie.

## **Kosten**

Uw deelname aan deze studie brengt geen extra kosten mee voor U.

## **Vergoeding**

Er zijn geen vergoedingen voorzien.

## **Vertrouwelijkheid**

### ***Algemeen***

U heeft het recht om aan de arts-onderzoeker te vragen welke gegevens hij/zij over u heeft verzameld en waarvoor ze gebruikt worden in het kader van de studie. In overeenstemming met de Belgische wet van 22 augustus 2002 betreffende de rechten van de patiënt en de Algemene Verordening Gegevensbescherming (of GDPR) (EU) 2016/679 van 27 april 2016 (die vanaf 25 mei 2018 in voege is) en de Belgische wet van 30 juli 2018, betreffende de bescherming van natuurlijke personen in verband met de verwerking van persoonsgegevens en betreffende het vrije verkeer van die gegevens, zal uw persoonlijke levenssfeer worden gerespecteerd en zal u toegang krijgen tot de verzamelde gegevens. Elk onjuist gegeven kan op uw verzoek verbeterd worden. Uw toestemming om deel te nemen aan de studie betekent dat we gegevens van u verwerken voor het doel van de klinische studie. Deze verwerking van gegevens is wettelijk voorzien op basis van artikel 6, § 1, (b), (e) of (f) en artikel 9, § 2(j) van de Algemene Verordening Gegevensbescherming.

Vertegenwoordigers van de opdrachtgever, auditoren, de Commissie voor Medische Ethiek en de bevoegde overheden hebben rechtstreeks toegang tot Uw medische dossiers om de procedures van de studie en/of de gegevens te controleren, zonder de vertrouwelijkheid te schenden. Dit kan enkel binnen de grenzen die door de betreffende wetten zijn toegestaan. Door het toestemmingsformulier, na voorafgaande uitleg, te ondertekenen stemt U in met deze toegang.

Als u akkoord gaat om aan deze studie deel te nemen, zullen uw persoonlijke en klinische gegevens tijdens deze studie worden verzameld en gecodeerd (hierbij kan men uw gegevens nog terug koppelen naar uw persoonlijk dossier). De sleutel tot deze codes zal enkel toegankelijk zijn voor de onderzoekende en behandelende arts of de verpleegkundige en/of studietoecoördinator. Verslagen waarin U wordt geïdentificeerd, zullen niet openlijk beschikbaar zijn. Als de resultaten van de studie worden gepubliceerd, zal uw identiteit vertrouwelijke informatie blijven.

Zowel persoonlijke gegevens als gegevens aangaande uw gezondheid zullen verwerkt en bewaard worden gedurende minstens 25 jaar. De verwerkingsverantwoordelijke van de gegevens is de hoofdonderzoeker, Prof. Piet Ost. Gegevens uit het patiëntendossier worden verwerkt in het kader van de verbeteringsprocessen van de organisatie en de gezondheidszorg in het algemeen.

Het is voor uw veiligheid aanbevolen om uw huisarts of andere behandelende artsen die bij uw behandeling betrokken zijn te informeren over uw deelname aan deze studie. Wij vragen u om hiervoor uw toestemming te geven. Indien u niet wenst dat zij hierover worden geïnformeerd, zullen wij uw keuze respecteren. De Data Protection Officer (DPO) kan u desgewenst meer informatie verschaffen over de bescherming van uw persoonsgegevens.

Contactgegevens DPO:

- UZ Gent: Katya Van Driessche, [dpo@uzgent.be](mailto:dpo@uzgent.be)
- AZ Sint-Lucas Gent: [veiligheidsconsulent@azstlucas.be](mailto:veiligheidsconsulent@azstlucas.be)
- AZ Sint-Lucas Brugge: Diederik Franco
- GasthuisZusters Antwerpen: [dpo@gza.be](mailto:dpo@gza.be)
- Instituut Jules Bordet: Etienne Stanus

De Belgische toezichthoudende instantie die verantwoordelijk is voor het handhaven van de wetgeving inzake gegevensbescherming is bereikbaar via onderstaande contactgegevens:

Gegevensbeschermingsautoriteit (GBA)  
Drukpersstraat 35, 1000 Brussel  
T. 02/274 48 00  
e-mail: [contact@apd-gba.be](mailto:contact@apd-gba.be)  
Website: [www.gegevensbeschermingsautoriteit.be](http://www.gegevensbeschermingsautoriteit.be)

### ***Biologische stalen die tijdens de studie worden afgenomen***

Voor de stalen wordt ook een coderingprocedure gebruikt net zoals voor uw medische gegevens. De aan de opdrachtgever overgedragen stalen zijn dus enkel voorzien van een identificatiecode in het kader van deze klinische studie.

Uw stalen zullen worden bewaard in de CHEERS biobank. Een biobank is een faciliteit waar menselijk lichaamsmateriaal (zoals bloed, urine, weefselstalen,...) samen met bijkomende gegevens die betrekking hebben tot dit materiaal, worden bewaard. Uw stalen zullen worden bewaard tot het einde van de studie en zullen gebruikt worden om de studiespecifieke analyses op uit te voeren. De beheerder van deze stalen (Prof. Dr. Piet Ost, C. Heymanslaan 10, B-9000 Gent) verbindt zich ertoe deze stalen alleen in het kader van deze klinische studie te gebruiken en ze te vernietigen na afloop van de voorziene bewaarperiode.

Binnen dit domein is er voortdurend sprake van technische vooruitgang. Daarom zouden wij, indien u hiermee akkoord gaat, uw biologische stalen graag gedurende 25 jaar willen bewaren voor toekomstig onderzoek. Deze studie blijft binnen de context van de huidige klinische studie en is dus gericht op beter begrip van de ziekte, de behandeling ervan en de respons op deze behandeling. Elk onderzoek buiten de context die in dit document wordt beschreven, kan alleen plaatsvinden na goedkeuring van een ethisch comité.

U blijft echter "eigenaar" van uw lichaamsmateriaal. Indien u uw toestemming tot deelname aan de studie intrekt, kan u uw staal/stalen laten vernietigen of terug

opvragen. Neem daarvoor contact op met de arts-onderzoeker. De resultaten die op basis van uw staal/stalen werden verkregen voordat u uw toestemming tot deelname hebt ingetrokken, blijven eigendom van de opdrachtgever.

## **Letsels ten gevolge van deelname aan de studie**

Elke deelname aan een studie houdt een risico in, hoe klein ook. De opdrachtgever is – ook indien er geen sprake is van fout – aansprakelijk voor de schade die de deelnemer of in geval van overlijden zijn/haar rechthebbenden, oplopen en die rechtstreeks of onrechtstreeks verband houdt met diens deelname aan de studie. U moet hiervoor dus geen fout aantonen. De opdrachtgever heeft voor deze aansprakelijkheid een verzekering afgesloten in overeenstemming met artikel 29 van de Belgische Wet inzake experimenten op de menselijke persoon (7 mei 2004).

We verzoeken u daarom om elk nieuw gezondheidsprobleem aan de arts-onderzoeker te melden alvorens een andere arts te raadplegen, een ander studiegeneesmiddel in te nemen of een andere medische behandeling te ondergaan. Indien u om eender welke reden gedurende deze klinische studie een andere arts raadpleegt, dient u deze te melden dat u deelneemt aan een klinische studie. Dit kan belangrijk zijn voor een juiste diagnose en behandeling van uw klachten.

Indien de arts-onderzoeker van mening is dat er een verband met de studie mogelijk is (er is geen verband met de studie bij schade ten gevolge van het natuurlijke verloop van uw ziekte of ten gevolge van gekende bijwerkingen van uw standaardbehandeling), zal hij/zij de opdrachtgever van de studie op de hoogte stellen die de aangifteprocedure bij de verzekering zal starten. Deze zal, indien zij het nodig acht, een expert aanstellen om een oordeel uit te spreken over het verband tussen uw nieuwe gezondheidsklachten en de studie.

In het geval van onenigheid met de arts-onderzoeker of met de door de verzekeringsmaatschappij aangestelde expert, en steeds wanneer u dit nodig acht, kunnen u of in geval van overlijden uw rechthebbenden de verzekeraar rechtstreeks in België dagvaarden (KBC Insurance – Polisnummer W8/28963726/0100).

De wet voorziet dat de dagvaarding van de verzekeraar kan gebeuren ofwel voor de rechter van de plaats waar de schadeverwekkende feiten zich hebben voorgedaan, ofwel voor de rechter van uw woonplaats, ofwel voor de rechter van de zetel van de verzekeraar (KBC Insurance NV; Professor Roger Van Overstraetenplein 2, 3000 Leuven; Tel: +32 16 24 55 81).

## **Contactpersoon**

Als u bijkomende informatie wenst, maar ook ingeval van problemen of indien u zich zorgen maakt, kunt U in de loop van de studie op elk ogenblik contact opnemen met:

Prof. Dr. Piet Ost of Dr. Mathieu Spaas

Dienst Radiotherapie-Oncologie, ingang 98  
UZ Gent  
C. Heymanslaan 10  
B-9000 Gent

## Toestemmingsformulier

- **Deelnemer**

Aankruisen door de deelnemer indien akkoord:

|                                                                                                                                                                                                                                                                                                                                                                                                                                                                                                                                                                                                    |  |
|----------------------------------------------------------------------------------------------------------------------------------------------------------------------------------------------------------------------------------------------------------------------------------------------------------------------------------------------------------------------------------------------------------------------------------------------------------------------------------------------------------------------------------------------------------------------------------------------------|--|
| Ik heb kennis genomen van het informatiedocument en de bijlagen ervan en er een kopij van gekregen. Ik stem in met de inhoud van het document en stem ook in deel te nemen aan deze studie.                                                                                                                                                                                                                                                                                                                                                                                                        |  |
| Ik heb een kopij gekregen van dit ondertekende en gedateerde formulier voor "Toestemmingsformulier". Ik heb uitleg gekregen over de aard, het doel, de duur, en de te voorziene effecten van de studie en over wat men van mij verwacht. Ik heb uitleg gekregen over de mogelijke risico's en voordelen van de studie. Men heeft me de gelegenheid en voldoende tijd gegeven om vragen te stellen over de studie, en ik heb op al mijn vragen een bevredigend antwoord gekregen, ook op medische vragen.                                                                                           |  |
| Ik stem ermee in om volledig samen te werken met de toeziende arts. Ik zal hem/haar op de hoogte brengen als ik onverwachte of ongebruikelijke symptomen ervaar. Ik bevestig dat ik de toeziende arts zal inlichten over eventuele geneesmiddelen, van welke aard ook, die ik in de maand voorafgaand aan de studie heb gebruikt, momenteel gebruik of van plan ben te gebruiken, ongeacht of ze al dan niet werden voorgeschreven.                                                                                                                                                                |  |
| Men heeft mij ingelicht over het bestaan van een verzekeringspolis in geval er letsel zou ontstaan dat aan de studieprocedures of aan de toediening van het (de) geneesmiddel(en) is toe te schrijven.                                                                                                                                                                                                                                                                                                                                                                                             |  |
| Ik ben me ervan bewust dat deze studie werd goedgekeurd door een onafhankelijke Commissie voor Medische Ethiek verbonden aan het UZ Gent en UGent, na raadpleging van alle ethische commissies van elk Belgisch centrum waar de studie zal worden uitgevoerd, en dat deze studie zal uitgevoerd worden volgens de richtlijnen voor de goede klinische praktijk (ICH/GCP) en de verklaring van Helsinki, opgesteld ter bescherming van mensen deelnemend aan experimenten. Deze goedkeuring was in geen geval de aanzet om te beslissen om deel te nemen aan deze studie.                           |  |
| Ik mag me op elk ogenblik uit de studie terugtrekken zonder een reden voor deze beslissing op te geven en zonder dat dit op enigerlei wijze een invloed zal hebben op mijn verdere relatie met de onderzoeker.                                                                                                                                                                                                                                                                                                                                                                                     |  |
| Men heeft mij ingelicht dat zowel persoonlijke gegevens als gegevens aangaande mijn gezondheid worden verwerkt en bewaard gedurende minstens 25 jaar. Ik stem hiermee in en ben op de hoogte dat ik recht heb op toegang en op verbetering van deze gegevens. Aangezien deze gegevens verwerkt worden in het kader van medisch-wetenschappelijke doeleinden, begrijp ik dat de toegang tot mijn gegevens kan uitgesteld worden tot na beëindiging van het onderzoek. Indien ik toegang wil tot mijn gegevens, zal ik mij richten tot de toeziende arts die verantwoordelijk is voor de verwerking. |  |
| Ik begrijp dat auditors, vertegenwoordigers van de opdrachtgever, de Commissie voor Medische Ethiek of bevoegde overheden, mijn gegevens mogelijk willen inspecteren om de verzamelde informatie te controleren. Door dit document te ondertekenen, geef ik toestemming voor deze controle. Bovendien ben ik op de hoogte dat bepaalde gegevens doorgegeven worden aan de opdrachtgever. Ik geef hiervoor mijn toestemming, zelfs indien dit betekent dat mijn gegevens doorgegeven worden aan een land buiten de Europese Unie. Te allen tijde zal mijn privacy gerespecteerd worden.             |  |

|                                                                                                                                                                         |  |
|-------------------------------------------------------------------------------------------------------------------------------------------------------------------------|--|
| Ik ga akkoord dat mijn huisarts, alsook andere arts-specialisten betrokken bij mijn behandeling, op de hoogte kunnen worden gebracht van mijn deelname aan deze studie. |  |
|-------------------------------------------------------------------------------------------------------------------------------------------------------------------------|--|

Ik stem in om deel te nemen aan de volgende delen van de studie:

- Ik ga akkoord dat een deel van het tumorweefsel dat tijdens een operatie verwijderd werd, gebruikt mag worden voor wetenschappelijk onderzoek en dat de onderzoekers dit afgenomen tumorweefsel mogen opvragen in een ander centrum.
- Ik ga akkoord dat er DNA/RNA geëxtraheerd mag worden uit de verkregen stalen om te gebruiken voor kankeronderzoek.
- Ik ga akkoord dat mijn stalen en data eventueel naar het buitenland en buiten de Europese Unie mogen getransfereerd worden voor kankeronderzoek.
- Ik ga akkoord dat mijn stalen en data verder mogen bewaard worden na de studie in een prospectieve biobank en mogen gebruikt worden voor toekomstig kankeronderzoek. Dergelijke nieuwe studie dient steeds ingediend en goedgekeurd te worden door het ethisch comité.

Naam van de deelnemer: \_\_\_\_\_

Datum: \_\_\_\_\_

Handtekening:

- **Getuige / Tolk**

Ik ben tijdens het volledige proces van informatieverstrekking aan de deelnemer aanwezig geweest en ik bevestig dat de informatie over de doelstellingen en procedures van de studie op adequate wijze is verstrekt, dat de deelnemer de studie naar alle waarschijnlijkheid heeft begrepen en dat de toestemming tot deelname aan de studie uit vrije wil is gegeven.

Naam van de getuige/tolk: \_\_\_\_\_

Datum: \_\_\_\_\_

Handtekening:

- **Arts-onderzoeker**

Aankruisen door de onderzoeker indien akkoord:

|                                                                                                                                                                                                                                                           |  |
|-----------------------------------------------------------------------------------------------------------------------------------------------------------------------------------------------------------------------------------------------------------|--|
| Ik ondergetekende, arts-onderzoeker, verklaar de benodigde informatie inzake deze studie mondeling te hebben verstrekt evenals een exemplaar van het informatiedocument aan de deelnemer te hebben verstrekt.                                             |  |
| Ik bevestig dat geen enkele druk op de deelnemer is uitgeoefend om hem/haar te doen toestemmen tot deelname aan de studie en ik ben bereid om op alle eventuele bijkomende vragen te antwoorden.                                                          |  |
| Ik bevestig dat ik werk in overeenstemming met de ethische beginselen zoals vermeld in de laatste versie van de "Verklaring van Helsinki", de "Goede klinische praktijk" en de Belgische wet van 7 mei 2004 inzake experimenten op de menselijke persoon. |  |

Naam van de  
arts-onderzoeker:

\_\_\_\_\_

Datum:

\_\_\_\_\_

Handtekening:

## Bijlage: Aanvullende informatie over de risico's die verbonden zijn aan deelname aan de studie

### ***Risico's in verband met de immuuntherapie***

Voor een overzicht van de ongewenste bijwerkingen van verschillende types immuuntherapie (nivolumab, pembrolizumab, atezolizumab) verwijzen we naar de respectievelijke bijsluiters.

### ***Risico's in verband met de radiotherapie***

Indien u besluit deel te nemen aan de studie, dan is er 50% kans dat u bestraald zal worden. Over het algemeen zijn de nevenwerkingen van radiotherapie afhankelijk van het lichaamsdeel dat bestraald wordt, de bestralingsdosis, de toedieningswijze en de algemene gezondheidstoestand. Hieronder vindt u een lijst van alle mogelijke bestralingsnevenwerkingen, onderverdeeld op basis van de regio die wordt behandeld. Het is belangrijk hierbij te vermelden dat voorgaande studies hebben aangetoond dat het toevoegen van stereotactische radiotherapie aan immuuntherapie niet leidde tot een toename van het aantal ernstige nevenwerkingen<sup>1-2</sup>.

|                                                           |                                                                                                                                                                                                                                                                                                                                                                                                                                                                                                                                                                                                                                                                                                                                                                                                                                                                                                                                                                                                                                                                                 |
|-----------------------------------------------------------|---------------------------------------------------------------------------------------------------------------------------------------------------------------------------------------------------------------------------------------------------------------------------------------------------------------------------------------------------------------------------------------------------------------------------------------------------------------------------------------------------------------------------------------------------------------------------------------------------------------------------------------------------------------------------------------------------------------------------------------------------------------------------------------------------------------------------------------------------------------------------------------------------------------------------------------------------------------------------------------------------------------------------------------------------------------------------------|
| Algemene nevenwerkingen                                   | <ul style="list-style-type: none"> <li>• Vermoeidheid</li> <li>• Huidproblemen ter hoogte van de bestraalde regio (roodheid, droogte, jeuk, bruine verkleuring, vorming van littekenweefsel)</li> <li>• Haarverlies ter hoogte van de bestraalde regio</li> <li>• Verminderde eetlust</li> <li>• Misselijkheid en braken</li> <li>• Afname van het aantal bloedcellen</li> </ul>                                                                                                                                                                                                                                                                                                                                                                                                                                                                                                                                                                                                                                                                                                |
| Nevenwerkingen van radiotherapie van het hoofd-halsgebied | <ul style="list-style-type: none"> <li>• Huidproblemen</li> <li>• Haarverlies</li> <li>• Droge mond</li> <li>• Smaakveranderingen</li> <li>• Slikmoeilijkheden</li> <li>• Oorpijn of verminderd gehoor indien het oor zich binnen de bestraalde zone bevindt</li> <li>• Stemveranderingen, zoals heesheid, indien de larynx zich binnen de bestraalde zone bevindt</li> <li>• Zichtstoornissen indien de radiotherapie de bloedvaten van het oog of de oogzenuw beschadigt</li> <li>• Droogte van de ogen of verlies van gezichtsvermogen indien de bestraalde zone de ogen omvat</li> <li>• Kaakstijfheid (trismus) indien de bestraalde zone de onderkaak omvat</li> <li>• Verminderde eetlust</li> <li>• Tandproblemen, zoals tandcariës</li> <li>• Misselijkheid en braken</li> <li>• Hormonale stoornissen – verminderde hormoonproductie kan een laattijdige nevenwerking zijn van radiotherapie van de hypothalamus, de hypofyse of de schildklier</li> <li>• Zenuwbeschadiging indien de radiotherapie schade aan de schedelzenuwen veroorzaakt, hetgeen het</li> </ul> |

|                                                    |                                                                                                                                                                                                                                                                                                                                                                                                                                                                                                                                                                                                                                                                                                                                |
|----------------------------------------------------|--------------------------------------------------------------------------------------------------------------------------------------------------------------------------------------------------------------------------------------------------------------------------------------------------------------------------------------------------------------------------------------------------------------------------------------------------------------------------------------------------------------------------------------------------------------------------------------------------------------------------------------------------------------------------------------------------------------------------------|
|                                                    | gezichtsvermogen, het gehoor, beweging van de tong, de nek of de schouder kan aantasten                                                                                                                                                                                                                                                                                                                                                                                                                                                                                                                                                                                                                                        |
| Nevenwerkingen van radiotherapie van de borstholte | <ul style="list-style-type: none"> <li>• Huidproblemen</li> <li>• Haarverlies</li> <li>• Keelpijn</li> <li>• Slikproblemen</li> <li>• Branderig gevoel in de maag</li> <li>• Heesheid indien de larynx zich binnen de bestraalde zone bevindt</li> <li>• Misselijkheid en braken indien de bestraalde zone zich dichtbij de maag bevindt</li> <li>• Smaakveranderingen</li> <li>• Verminderde eetlust</li> <li>• Hoest</li> <li>• Longontsteking uitgelokt door de bestraling (radiopneumonie)</li> <li>• Gevoeligheid of zwelling van de borst</li> <li>• Vorming van littekenweefsel in de longen (pulmonaire fibrose)</li> <li>• Hartlijden zoals een onregelmatige hartslag, hartfalen of coronaire hartziekte.</li> </ul> |
| Nevenwerkingen van radiotherapie van de buikholte  | <ul style="list-style-type: none"> <li>• Huidproblemen</li> <li>• Haarverlies</li> <li>• Misselijkheid en braken</li> <li>• Verteringsmoeilijkheden</li> <li>• Opgeblazen gevoel of winderigheid</li> <li>• Verminderde eetlust</li> <li>• Diarree</li> <li>• Maagzweren</li> <li>• Darmontsteking uitgelokt door de bestraling (radio-enteritis)</li> <li>• Nierproblemen</li> </ul>                                                                                                                                                                                                                                                                                                                                          |
| Nevenwerkingen van radiotherapie van het bekken    | <ul style="list-style-type: none"> <li>• Huidproblemen</li> <li>• Haarverlies</li> <li>• Diarree</li> <li>• Misselijkheid en braken</li> <li>• Rectaal bloedverlies</li> <li>• Ontsteking van de endeldarm of de anus</li> <li>• Pijn bij de stoelgang</li> <li>• Onwillekeurig verlies van stoelgang (incontinentie)</li> <li>• Darmontsteking uitgelokt door de bestraling (radio-enteritis)</li> <li>• Blaasontsteking (cystitis)</li> <li>• Branderig gevoel of pijn bij het plassen</li> <li>• Bloed in de urine</li> <li>• Plasdrang</li> <li>• Urineverlies (incontinentie)</li> <li>• Vruchtbaarheidsproblemen</li> <li>• Seksuele stoornissen bij vrouwen</li> </ul>                                                  |



|                            |                                                                                                                                                                                                                                                                                                                                                                                                                             |
|----------------------------|-----------------------------------------------------------------------------------------------------------------------------------------------------------------------------------------------------------------------------------------------------------------------------------------------------------------------------------------------------------------------------------------------------------------------------|
|                            | <ul style="list-style-type: none"><li>• Seksuele stoornissen bij mannen, waaronder erectiele dysfunctie</li></ul>                                                                                                                                                                                                                                                                                                           |
| Laattijdige nevenwerkingen | <ul style="list-style-type: none"><li>• Vruchtbaarheidsproblemen (indien u bestraald werd op het bekken)</li><li>• Hartlijden (indien u bestraald werd op de borstholte)</li><li>• Longlijden (indien u bestraald werd op de borstholte)</li><li>• Huidverkleuring</li><li>• Mentale of emotionele problemen (indien u bestraald werd op het hoofd-halsgebied)</li><li>• Osteoporose</li><li>• Secundaire kankers</li></ul> |

<sup>1</sup> Theelen W, Peulen H, Lalezari F, et al. Randomized phase II study of pembrolizumab after stereotactic body radiotherapy (SBRT) versus pembrolizumab alone in patients with advanced non-small cell lung cancer: The PEMBRO-RT study. J Clin Oncol. 2018 May;36:15\_suppl, 9023-9023.

<sup>2</sup> McBride SM, Sherma EJ, Tzai CJ, et al. A phase II randomized trial of nivolumab with stereotactic body radiotherapy (SBRT) versus nivolumab alone in metastatic (M1) head and neck squamous cell carcinoma (HNSCC). J Clin Oncol. 2018 May;36:15\_suppl, 6009-6009.

# APPENDIX C – CASE REPORT FORM

**Case report form**

**Patient unique ID**

|  |  |
|--|--|
|  |  |
|--|--|

CHEckpoint inhibition in combination with an immunoboost of External body Radiotherapy in Solid tumors:  
CHEERS-trial

**Inclusion Criteria:**

Please check boxes corresponding to any of the inclusion criteria failed:

- Before patient registration, written informed consent must be given according to ICH/GCP and national/local regulations.
- Histologically confirmed diagnosis of a solid tumor.
- At least one extracranial tumour lesion available for radiotherapy administration
- Patient will receive a checkpoint inhibitor per standard of care in one of the following settings:
  - melanoma: 1<sup>st</sup>-3<sup>rd</sup> line nivolumab or pembrolizumab
  - renal cell carcinoma: 2<sup>nd</sup> line nivolumab
  - non-small cell lung carcinoma: 2<sup>nd</sup> or 3<sup>rd</sup> line nivolumab or pembrolizumab
  - urothelial cell carcinoma: 1<sup>st</sup>-3<sup>rd</sup> line nivolumab or pembrolizumab or atezolizumab
  - head- and neck squamous cell carcinoma: 1<sup>st</sup>-2<sup>nd</sup> line pembrolizumab, 2<sup>nd</sup> line nivolumab
- Karnofsky Performance status > 60
- Age 18 years or older.

**Exclusion criteria:**

Please check boxes corresponding to any of the exclusion criteria that disqualified the subject from entry

- Prior radiotherapy preventing treatment with SBRT.
- Prior treatment with an anti-PD-(L)1 antibody.
- Has a known additional malignancy that is progressing or requires active treatment. Exceptions include basal cell carcinoma of the skin or squamous cell carcinoma of the skin that has undergone potentially curative therapy or in situ cervical cancer or prostate cancer that has undergone potentially curative therapy and with normalized PSA.
- Uncontrolled central nervous system (CNS) metastases at baseline (controlled = previously-treated CNS metastases (surgery ± radiotherapy, radiosurgery, or gamma knife) and who meet both of the following criteria: a) are asymptomatic and b) have no requirement for steroids or enzyme-inducing anticonvulsants), and/or carcinomatous meningitis.
- Any condition requiring systemic treatment with corticosteroids (> 10 mg daily prednisone equivalent) or other immunosuppressive medication within 14 days prior to the first dose of study drug. Inhaled steroids and adrenal replacement steroid doses > 10 mg daily prednisone equivalent are permitted in the absence of active autoimmune disease.
- Has a diagnosis of immunodeficiency or history of human immunodeficiency virus (HIV), Hepatitis B or Hepatitis C infection.
- Mental condition rendering the patient unable to understand the nature, scope and possible consequences of the study.
- Patient not likely to comply with the protocol; i.e. uncooperative attitude, inability to return for follow-up visits and unlikely to complete the study.
- Contraindication for radiotherapy.
- Female subjects of childbearing potential must be willing to use an adequate method of contraception for the course of the study through 120 days after the last dose of study medication.

**Demography**

|                                  |
|----------------------------------|
| Date of Birth: ...../...../..... |
| Sex (M/F):                       |

**Vital signs**

|                  |
|------------------|
| Height: ..... cm |
| Weight: ..... kg |

**Karnofsky performance score**

|                                                                                                                    |
|--------------------------------------------------------------------------------------------------------------------|
| <input type="checkbox"/> 100% - Normal; no complaints; no evidence of disease.                                     |
| <input type="checkbox"/> 90% - Able to carry on normal activity; minor signs or symptoms of disease.               |
| <input type="checkbox"/> 80% - Normal activity with effort; some signs or symptoms of disease.                     |
| <input type="checkbox"/> 70% - Cares for self; unable to carry on normal activity or to do active work.            |
| <input type="checkbox"/> 60% - Requires occasional assistance, but is able to care for most of his personal needs. |
| <input type="checkbox"/> 50% - Requires considerable assistance and frequent medical care.                         |
| <input type="checkbox"/> 40% - Disabled; requires special care and assistance.                                     |
| <input type="checkbox"/> 30% - Severely disabled; hospital admission is indicated although death not imminent.     |
| <input type="checkbox"/> 20% - Very sick; hospital admission necessary; active supportive treatment necessary.     |
| <input type="checkbox"/> 10% - Moribund; fatal processes progressing rapidly.                                      |
| <input type="checkbox"/> 0% - Dead                                                                                 |

Prior malignancy:

|                                                                                  |
|----------------------------------------------------------------------------------|
| Prior malignancy?<br><input type="checkbox"/> Yes<br><input type="checkbox"/> No |
|----------------------------------------------------------------------------------|

|                            |
|----------------------------|
| Date of diagnosis: .....   |
| Primary tumour type: ..... |
| Tumour histology: .....    |
| Stage: .....               |

Prior radiotherapy:

|                                                                                    |
|------------------------------------------------------------------------------------|
| Prior radiotherapy?<br><input type="checkbox"/> Yes<br><input type="checkbox"/> No |
|------------------------------------------------------------------------------------|

| Location | Total dose (Gy) | Dose/fraction | Start date | Stop date |
|----------|-----------------|---------------|------------|-----------|
| 1.       |                 |               |            |           |
| 2.       |                 |               |            |           |
| 3.       |                 |               |            |           |

**Disease characteristics:**

Histological diagnosis:.....

TNM-stage at initial diagnosis: ...T... ...N... ...M...

Date disease diagnosed: .....

Type and date of checkpoint inhibitor to be started:  
.....  
given every ..... weeks

**Concomitant medications:**

(print and add file)

.....

**Baseline lab:**

Print and add file



**Treatment arm:**

|                                                                                                                                                                                               |
|-----------------------------------------------------------------------------------------------------------------------------------------------------------------------------------------------|
| Arm A: interventional arm<br>Lesions selected for SBRT: <ul style="list-style-type: none"><li>○ Lesion 1:.....</li><li>○ Lesion 2:.....</li><li>○ Lesion 3:.....</li></ul> Arm B: control arm |
|-----------------------------------------------------------------------------------------------------------------------------------------------------------------------------------------------|

**Fecal sample:**

|                                                  |
|--------------------------------------------------|
| <input type="checkbox"/> Date: ...../...../..... |
|--------------------------------------------------|

**Liquid biopsies:**

|                                                                           |
|---------------------------------------------------------------------------|
| <input type="checkbox"/> Before start CPI, date: ...../...../.....        |
| <input type="checkbox"/> Before first fraction of SBRT: ...../...../..... |
| <input type="checkbox"/> Before third cycle of CPI: ...../...../.....     |
| <input type="checkbox"/> At first evaluation: ...../...../.....           |
| <input type="checkbox"/> At ..... evaluation: ...../...../.....           |

### **Definition of an Adverse Event (AE)**

An **Adverse Event (AE)** is defined as any untoward medical occurrence or experience in a patient or clinical investigation subject which occurs following the trial treatment regardless of the dose or causal relationship. This can include any unfavorable and unintended signs (such as rash or enlarged liver), or symptoms (such as nausea or chest pain), an abnormal laboratory finding (including blood tests, x-rays or scans) or a disease temporarily associated with the use of the protocol treatment (ICH-GCP).

### **Definition of a Serious Adverse Event (SAE)**

A **Serious Adverse Event (SAE)** is defined as any undesirable experience occurring to a patient, whether or not considered related to the protocol treatment. A **Serious Adverse Event (SAE)** which is considered related to the protocol treatment is defined as a **Serious Adverse Drug Reaction (SADR)**.

Adverse events and adverse drug reactions which are considered as serious are those which result in:

- ◆ death
- ◆ a life threatening event (i.e. the patient was at immediate risk of death at the time the reaction was observed)
- ◆ hospitalization or prolongation of hospitalization
- ◆ persistent or significant disability/incapacity
- ◆ a congenital anomaly/birth defect
- ◆ any other medically important condition (i.e. important adverse reactions that are not immediately life threatening or do not result in death or hospitalization but may jeopardize the patient or may require intervention to prevent one of the other outcomes listed above)

P-RTH-007 PO  
EC 2017/1678

**CHEERS-trial**

contact: mathieu.spaas@uzgent.be  
PI: Prof. Piet Ost

ADVERSE EVENTS LOG

Patient ID number: .....

| Adverse Event | Start Date / Time | Stop Date / Time | Type of AE                                                               | Serious?*                                                   | Intensity/Severity                                                                                                                                                                                | Relationship                                                                                                                                                                             | Action taken                                                                                                                                                                                                                        | Outcome                                                                                                                                                                           | PI signature |
|---------------|-------------------|------------------|--------------------------------------------------------------------------|-------------------------------------------------------------|---------------------------------------------------------------------------------------------------------------------------------------------------------------------------------------------------|------------------------------------------------------------------------------------------------------------------------------------------------------------------------------------------|-------------------------------------------------------------------------------------------------------------------------------------------------------------------------------------------------------------------------------------|-----------------------------------------------------------------------------------------------------------------------------------------------------------------------------------|--------------|
|               |                   |                  | <input type="checkbox"/> Expected<br><input type="checkbox"/> Unexpected | <input type="checkbox"/> Yes<br><input type="checkbox"/> No | <input type="checkbox"/> Mild<br><input type="checkbox"/> Moderate<br><input type="checkbox"/> Severe<br><input type="checkbox"/> Life-threatening or disabling<br><input type="checkbox"/> Death | <input type="checkbox"/> Unrelated<br><input type="checkbox"/> Unlikely<br><input type="checkbox"/> Possible<br><input type="checkbox"/> Probable<br><input type="checkbox"/> Definitely | <input type="checkbox"/> None<br><input type="checkbox"/> Treatment<br><input type="checkbox"/> Discontinued<br><input type="checkbox"/> Changed dose<br><input type="checkbox"/> Hospitalization<br><input type="checkbox"/> Other | <input type="checkbox"/> Recovered<br><input type="checkbox"/> Improved<br><input type="checkbox"/> Ongoing<br><input type="checkbox"/> Death<br><input type="checkbox"/> Unknown |              |
|               |                   |                  | <input type="checkbox"/> Expected<br><input type="checkbox"/> Unexpected | <input type="checkbox"/> Yes<br><input type="checkbox"/> No | <input type="checkbox"/> Mild<br><input type="checkbox"/> Moderate<br><input type="checkbox"/> Severe<br><input type="checkbox"/> Life-threatening or disabling<br><input type="checkbox"/> Death | <input type="checkbox"/> Unrelated<br><input type="checkbox"/> Unlikely<br><input type="checkbox"/> Possible<br><input type="checkbox"/> Probable<br><input type="checkbox"/> Definitely | <input type="checkbox"/> None<br><input type="checkbox"/> Treatment<br><input type="checkbox"/> Discontinued<br><input type="checkbox"/> Changed dose<br><input type="checkbox"/> Hospitalization<br><input type="checkbox"/> Other | <input type="checkbox"/> Recovered<br><input type="checkbox"/> Improved<br><input type="checkbox"/> Ongoing<br><input type="checkbox"/> Death<br><input type="checkbox"/> Unknown |              |
|               |                   |                  | <input type="checkbox"/> Expected<br><input type="checkbox"/> Unexpected | <input type="checkbox"/> Yes<br><input type="checkbox"/> No | <input type="checkbox"/> Mild<br><input type="checkbox"/> Moderate<br><input type="checkbox"/> Severe<br><input type="checkbox"/> Life-threatening or disabling<br><input type="checkbox"/> Death | <input type="checkbox"/> Unrelated<br><input type="checkbox"/> Unlikely<br><input type="checkbox"/> Possible<br><input type="checkbox"/> Probable<br><input type="checkbox"/> Definitely | <input type="checkbox"/> None<br><input type="checkbox"/> Treatment<br><input type="checkbox"/> Discontinued<br><input type="checkbox"/> Changed dose<br><input type="checkbox"/> Hospitalization<br><input type="checkbox"/> Other | <input type="checkbox"/> Recovered<br><input type="checkbox"/> Improved<br><input type="checkbox"/> Ongoing<br><input type="checkbox"/> Death<br><input type="checkbox"/> Unknown |              |
|               |                   |                  | <input type="checkbox"/> Expected<br><input type="checkbox"/> Unexpected | <input type="checkbox"/> Yes<br><input type="checkbox"/> No | <input type="checkbox"/> Mild<br><input type="checkbox"/> Moderate<br><input type="checkbox"/> Severe<br><input type="checkbox"/> Life-threatening or disabling<br><input type="checkbox"/> Death | <input type="checkbox"/> Unrelated<br><input type="checkbox"/> Unlikely<br><input type="checkbox"/> Possible<br><input type="checkbox"/> Probable<br><input type="checkbox"/> Definitely | <input type="checkbox"/> None<br><input type="checkbox"/> Treatment<br><input type="checkbox"/> Discontinued<br><input type="checkbox"/> Changed dose<br><input type="checkbox"/> Hospitalization<br><input type="checkbox"/> Other | <input type="checkbox"/> Recovered<br><input type="checkbox"/> Improved<br><input type="checkbox"/> Ongoing<br><input type="checkbox"/> Death<br><input type="checkbox"/> Unknown |              |

P-RTH-007 PO  
EC 2017/1678

**CHEERS-trial**

contact: mathieu.spaas@uzgent.be  
PI: Prof. Piet Ost

| Adverse Event | Start Date / Time | Stop Date / Time | Type of AE                                                               | Serious?*                                                   | Intensity/Severity                                                                                                                                                                                | Relationship                                                                                                                                                                             | Action taken                                                                                                                                                                                                                        | Outcome                                                                                                                                                                           | PI signature |
|---------------|-------------------|------------------|--------------------------------------------------------------------------|-------------------------------------------------------------|---------------------------------------------------------------------------------------------------------------------------------------------------------------------------------------------------|------------------------------------------------------------------------------------------------------------------------------------------------------------------------------------------|-------------------------------------------------------------------------------------------------------------------------------------------------------------------------------------------------------------------------------------|-----------------------------------------------------------------------------------------------------------------------------------------------------------------------------------|--------------|
|               |                   |                  | <input type="checkbox"/> Expected<br><input type="checkbox"/> Unexpected | <input type="checkbox"/> Yes<br><input type="checkbox"/> No | <input type="checkbox"/> Mild<br><input type="checkbox"/> Moderate<br><input type="checkbox"/> Severe<br><input type="checkbox"/> Life-threatening or disabling<br><input type="checkbox"/> Death | <input type="checkbox"/> Unrelated<br><input type="checkbox"/> Unlikely<br><input type="checkbox"/> Possible<br><input type="checkbox"/> Probable<br><input type="checkbox"/> Definitely | <input type="checkbox"/> None<br><input type="checkbox"/> Treatment<br><input type="checkbox"/> Discontinued<br><input type="checkbox"/> Changed dose<br><input type="checkbox"/> Hospitalization<br><input type="checkbox"/> Other | <input type="checkbox"/> Recovered<br><input type="checkbox"/> Improved<br><input type="checkbox"/> Ongoing<br><input type="checkbox"/> Death<br><input type="checkbox"/> Unknown |              |
|               |                   |                  | <input type="checkbox"/> Expected<br><input type="checkbox"/> Unexpected | <input type="checkbox"/> Yes<br><input type="checkbox"/> No | <input type="checkbox"/> Mild<br><input type="checkbox"/> Moderate<br><input type="checkbox"/> Severe<br><input type="checkbox"/> Life-threatening or disabling<br><input type="checkbox"/> Death | <input type="checkbox"/> Unrelated<br><input type="checkbox"/> Unlikely<br><input type="checkbox"/> Possible<br><input type="checkbox"/> Probable<br><input type="checkbox"/> Definitely | <input type="checkbox"/> None<br><input type="checkbox"/> Treatment<br><input type="checkbox"/> Discontinued<br><input type="checkbox"/> Changed dose<br><input type="checkbox"/> Hospitalization<br><input type="checkbox"/> Other | <input type="checkbox"/> Recovered<br><input type="checkbox"/> Improved<br><input type="checkbox"/> Ongoing<br><input type="checkbox"/> Death<br><input type="checkbox"/> Unknown |              |
|               |                   |                  | <input type="checkbox"/> Expected<br><input type="checkbox"/> Unexpected | <input type="checkbox"/> Yes<br><input type="checkbox"/> No | <input type="checkbox"/> Mild<br><input type="checkbox"/> Moderate<br><input type="checkbox"/> Severe<br><input type="checkbox"/> Life-threatening or disabling<br><input type="checkbox"/> Death | <input type="checkbox"/> Unrelated<br><input type="checkbox"/> Unlikely<br><input type="checkbox"/> Possible<br><input type="checkbox"/> Probable<br><input type="checkbox"/> Definitely | <input type="checkbox"/> None<br><input type="checkbox"/> Treatment<br><input type="checkbox"/> Discontinued<br><input type="checkbox"/> Changed dose<br><input type="checkbox"/> Hospitalization<br><input type="checkbox"/> Other | <input type="checkbox"/> Recovered<br><input type="checkbox"/> Improved<br><input type="checkbox"/> Ongoing<br><input type="checkbox"/> Death<br><input type="checkbox"/> Unknown |              |
|               |                   |                  | <input type="checkbox"/> Expected<br><input type="checkbox"/> Unexpected | <input type="checkbox"/> Yes<br><input type="checkbox"/> No | <input type="checkbox"/> Mild<br><input type="checkbox"/> Moderate<br><input type="checkbox"/> Severe<br><input type="checkbox"/> Life-threatening or disabling<br><input type="checkbox"/> Death | <input type="checkbox"/> Unrelated<br><input type="checkbox"/> Unlikely<br><input type="checkbox"/> Possible<br><input type="checkbox"/> Probable<br><input type="checkbox"/> Definitely | <input type="checkbox"/> None<br><input type="checkbox"/> Treatment<br><input type="checkbox"/> Discontinued<br><input type="checkbox"/> Changed dose<br><input type="checkbox"/> Hospitalization<br><input type="checkbox"/> Other | <input type="checkbox"/> Recovered<br><input type="checkbox"/> Improved<br><input type="checkbox"/> Ongoing<br><input type="checkbox"/> Death<br><input type="checkbox"/> Unknown |              |



|                                |  |
|--------------------------------|--|
| Setting (hospital, home, ...): |  |
|--------------------------------|--|

| <b>STUDY DRUG INFORMATION:</b>               |                   |                                |                                                          |
|----------------------------------------------|-------------------|--------------------------------|----------------------------------------------------------|
| <b>Drug Name</b><br>(trade name if possible) | <b>Daily dose</b> | <b>Route of administration</b> | <b>Therapy days (dd/mm/yy)</b><br>(from/to, time of day) |
|                                              |                   |                                |                                                          |
|                                              |                   |                                |                                                          |
|                                              |                   |                                |                                                          |
|                                              |                   |                                |                                                          |
|                                              |                   |                                |                                                          |
|                                              |                   |                                |                                                          |
|                                              |                   |                                |                                                          |

|                                                                                                                                                                                               |
|-----------------------------------------------------------------------------------------------------------------------------------------------------------------------------------------------|
| <p><b>SAE NARRATIVE:</b><br/>Describe the serious adverse event, including full description of the signs or symptoms, event duration, treatment administered , actions taken and outcome.</p> |
|-----------------------------------------------------------------------------------------------------------------------------------------------------------------------------------------------|

| <b>CONCOMITANT MEDICATIONS:</b> |                                            |                                          |                                  |
|---------------------------------|--------------------------------------------|------------------------------------------|----------------------------------|
| <b>Drug Name</b>                | <b>Dose, administration route, regimen</b> | <b>Start &amp; stop dates (dd/mm/yy)</b> | <b>Reason for administration</b> |
|                                 |                                            |                                          |                                  |
|                                 |                                            |                                          |                                  |
|                                 |                                            |                                          |                                  |
|                                 |                                            |                                          |                                  |
|                                 |                                            |                                          |                                  |
|                                 |                                            |                                          |                                  |
|                                 |                                            |                                          |                                  |
|                                 |                                            |                                          |                                  |

| <b>RELEVANT LABORATORY AND DIAGNOSTIC TESTS OR PROCEDURES:</b> |             |                                                                                      |
|----------------------------------------------------------------|-------------|--------------------------------------------------------------------------------------|
| <b>Date (dd/mm/yy)</b>                                         | <b>Test</b> | <b>Results (+ normal range if applicable)<br/>Please attach report when possible</b> |
|                                                                |             |                                                                                      |
|                                                                |             |                                                                                      |
|                                                                |             |                                                                                      |
|                                                                |             |                                                                                      |
|                                                                |             |                                                                                      |
|                                                                |             |                                                                                      |
|                                                                |             |                                                                                      |
|                                                                |             |                                                                                      |
|                                                                |             |                                                                                      |

| <b>ASSESSMENT OF CAUSALITY:</b>      |                                                                                                               |                                                                                                                          |
|--------------------------------------|---------------------------------------------------------------------------------------------------------------|--------------------------------------------------------------------------------------------------------------------------|
| Is SAE related to trial medication ? | <input type="checkbox"/> Definitely<br><input type="checkbox"/> Probably<br><input type="checkbox"/> Possibly | <input type="checkbox"/> Unlikely<br><input type="checkbox"/> Not related:<br>please explain: (add attachment if needed) |
| Expected SAE ?                       | <input type="checkbox"/> Yes<br><input type="checkbox"/> No                                                   | If yes, mention source:                                                                                                  |

| <b>SIGNATURES:</b>                                                                         |                  |
|--------------------------------------------------------------------------------------------|------------------|
| Report completed by:                                                                       |                  |
| Print Name:                                                                                |                  |
| Signature:                                                                                 | Date (dd/mm/yy): |
| I have reviewed this serious adverse event report and find it to be complete and accurate. |                  |
| Signature of investigator:                                                                 | Date (dd/mm/yy): |

**Response evaluation and survival data:**

Date of first radiographic progression (RECIST v1.1): ...../...../.....

Date of confirmed radiographic progression (iRECIST: iCPD): ...../...../.....

Date of first clinical progression (if prior to radiographic progression): ...../...../.....

Date of last checkpoint inhibitor infusion: ...../...../.....

Date of start of subsequent treatment: ...../...../.....

Type of subsequent treatment: ...../...../.....

Date of death: ...../...../.....





## REFERENCES

1. Larkin J, Minor D, D'Angelo S, Neyns B, Smylie M, Miller WH, Jr., et al. Overall Survival in Patients With Advanced Melanoma Who Received Nivolumab Versus Investigator's Choice Chemotherapy in CheckMate 037: A Randomized, Controlled, Open-Label Phase III Trial. *Journal of clinical oncology : official journal of the American Society of Clinical Oncology*. 2017;Jco2016718023.
2. Bellmunt J, de Wit R, Vaughn DJ, Fradet Y, Lee JL, Fong L, et al. Pembrolizumab as Second-Line Therapy for Advanced Urothelial Carcinoma. *The New England journal of medicine*. 2017.
3. Herbst RS, Baas P, Kim DW, Felip E, Perez-Gracia JL, Han JY, et al. Pembrolizumab versus docetaxel for previously treated, PD-L1-positive, advanced non-small-cell lung cancer (KEYNOTE-010): a randomised controlled trial. *Lancet*. 2016;387(10027):1540-50.
4. Schachter J, Ribas A, Long GV, Arance A, Grob JJ, Mortier L, et al. Pembrolizumab versus ipilimumab for advanced melanoma: final overall survival results of a multicentre, randomised, open-label phase 3 study (KEYNOTE-006). *Lancet (London, England)*. 2017.
5. Zaretsky JM, Garcia-Diaz A, Shin DS, Escuin-Ordinas H, Hugo W, Hu-Lieskovan S, et al. Mutations Associated with Acquired Resistance to PD-1 Blockade in Melanoma. *N Engl J Med*. 2016;375(9):819-29.
6. Byrne EH, Fisher DE. Immune and molecular correlates in melanoma treated with immune checkpoint blockade. *Cancer*. 2017;123(S11):2143-53.
7. Formenti SC, Demaria S. Systemic effects of local radiotherapy. *Lancet Oncol*. 2009;10(7):718-26.
8. Hiniker SM, Reddy SA, Maecker HT, Subrahmanyam PB, Rosenberg-Hasson Y, Swetter SM, et al. A Prospective Clinical Trial Combining Radiation Therapy With Systemic Immunotherapy in Metastatic Melanoma. *Int J Radiat Oncol Biol Phys*. 2016;96(3):578-88.
9. Twyman-Saint Victor C, Rech AJ, Maity A, Rengan R, Pauken KE, Stelekati E, et al. Radiation and dual checkpoint blockade activate non-redundant immune mechanisms in cancer. *Nature*. 2015;520(7547):373-7.
10. Vanpouille-Box C, Pilonis KA, Wennerberg E, Formenti SC, Demaria S. In situ vaccination by radiotherapy to improve responses to anti-CTLA-4 treatment. *Vaccine*. 2015;33(51):7415-22.
11. Postow MA, Callahan MK, Barker CA, Yamada Y, Yuan J, Kitano S, et al. Immunologic correlates of the abscopal effect in a patient with melanoma. *N Engl J Med*. 2012;366(10):925-31.
12. Abuodeh Y, Venkat P, Kim S. Systematic review of case reports on the abscopal effect. *Curr Probl Cancer*. 2016;40(1):25-37.
13. Stamell EF, Wolchok JD, Gnjatic S, Lee NY, Brownell I. The abscopal effect associated with a systemic anti-melanoma immune response. *Int J Radiat Oncol Biol Phys*. 2013;85(2):293-5.
14. Seung SK, Curti BD, Crittenden M, Walker E, Coffey T, Siebert JC, et al. Phase I study of stereotactic body radiotherapy and interleukin-2--tumor and immunological responses. *Sci Transl Med*. 2012;4(137):137ra74.
15. Durante M, Reppingen N, Held KD. Immunologically augmented cancer treatment using modern radiotherapy. *Trends Mol Med*. 2013;19(9):565-82.
16. Vanpouille-Box C, Alard A, Aryankalayil MJ, Sarfraz Y, Diamond JM, Schneider RJ. DNA exonuclease Trex1 regulates radiotherapy-induced tumour immunogenicity. 2017;8:15618.
17. Sundahl N, De Wolf K, Kruse V, Meireson A, Reynders D, Goetghebeur E, et al. Phase I Dose Escalation Trial of Ipilimumab and Stereotactic Body Radiation Therapy in Metastatic Melanoma. *International Journal of Radiation Oncology • Biology • Physics*. 100(4):906-15.
18. Benedict SH, Yenice KM, Followill D, Galvin JM, Hinson W, Kavanagh B, et al. Stereotactic body radiation therapy: the report of AAPM Task Group 101. *Med Phys*. 2010;37(8):4078-101.
19. Chevolet I, Speeckaert R, Schreuer M, Neyns B, Krysko O, Bachert C, et al. Clinical significance of plasmacytoid dendritic cells and myeloid-derived suppressor cells in melanoma. *J Transl Med*. 2015;13:9.
20. Van Roy N, Van Der Linden M, Menten B, Dheedene A, Vandeputte C, Van Dorpe J, et al. Shallow Whole Genome Sequencing on Circulating Cell-Free DNA Allows Reliable Noninvasive Copy-Number Profiling in Neuroblastoma Patients. *Clinical cancer research : an official journal of the American Association for Cancer Research*. 2017.
21. Robert C, Long GV, Brady B, Dutriaux C, Maio M, Mortier L, et al. Nivolumab in previously untreated melanoma without BRAF mutation. *N Engl J Med*. 2015;372(4):320-30.
22. Larkin J, Chiarion-Sileni V, Gonzalez R, Grob JJ, Cowey CL, Lao CD, et al. Combined Nivolumab and Ipilimumab or Monotherapy in Untreated Melanoma. *N Engl J Med*. 2015;373(1):23-34.

23. Schachter J, Ribas A, Long GV, Arance A, Grob JJ, Mortier L, et al. Pembrolizumab versus ipilimumab for advanced melanoma: final overall survival results of a multicentre, randomised, open-label phase 3 study (KEYNOTE-006). *Lancet*. 2017;390(10105):1853-62.
24. Robert C, Schachter J, Long GV, Arance A, Grob JJ, Mortier L, et al. Pembrolizumab versus Ipilimumab in Advanced Melanoma. *N Engl J Med*. 2015;372(26):2521-32.
25. Motzer RJ, Escudier B, McDermott DF, George S, Hammers HJ, Srinivas S, et al. Nivolumab versus Everolimus in Advanced Renal-Cell Carcinoma. *N Engl J Med*. 2015;373(19):1803-13.
26. Borghaei H, Paz-Ares L, Horn L, Spigel DR, Steins M, Ready NE, et al. Nivolumab versus Docetaxel in Advanced Nonsquamous Non-Small-Cell Lung Cancer. *N Engl J Med*. 2015;373(17):1627-39.
27. Brahmer J, Reckamp KL, Baas P, Crino L, Eberhardt WE, Poddubskaya E, et al. Nivolumab versus Docetaxel in Advanced Squamous-Cell Non-Small-Cell Lung Cancer. *N Engl J Med*. 2015;373(2):123-35.
28. Bellmunt J, de Wit R, Vaughn DJ, Fradet Y, Lee JL, Fong L, et al. Pembrolizumab as Second-Line Therapy for Advanced Urothelial Carcinoma. *The New England journal of medicine*. 2017;376(11):1015-26.
29. Sharma P, Retz M, Siefker-Radtke A, Baron A, Necchi A, Bedke J, et al. Nivolumab in metastatic urothelial carcinoma after platinum therapy (CheckMate 275): a multicentre, single-arm, phase 2 trial. *Lancet Oncol*. 2017;18(3):312-22.
30. Ferris RL, Blumenschein G, Jr., Fayette J, Guigay J, Colevas AD, Licitra L, et al. Nivolumab for Recurrent Squamous-Cell Carcinoma of the Head and Neck. *N Engl J Med*. 2016;375(19):1856-67.
31. Burtneß B, Harrington KJ, Greil R, Soulieres D, Tahara M, de Castro G, Jr., et al. Pembrolizumab alone or with chemotherapy versus cetuximab with chemotherapy for recurrent or metastatic squamous cell carcinoma of the head and neck (KEYNOTE-048): a randomised, open-label, phase 3 study. *Lancet*. 2019;394(10212):1915-28.
