# Supplementary material
Source: PubMed Central journal article supplement (PMC10326732)
Supplement: jamaoncol-e232132-s002.pdf [file jamaoncol-e232132-s002.pdf]

## Supplemental Online Content

Spaas M, Sundahl N, Kruse V, et al. Checkpoint inhibitors in combination with stereotactic body radiotherapy in patients with advanced solid tumors: the CHEERS phase 2 randomized clinical trial. *JAMA Oncol*. Published online July 6, 2023. doi:10.1001/jamaoncol.2023.2132

**eTable 1.** Overview of Disease Burden at Baseline

**eFigure 1.** Subgroup Analysis of Progression-free Survival

**eFigure 2.** Subgroup Analysis of Overall Survival

**eTable 2.** Subgroup Analysis of Disease Burden and Radiation Targets in the Experimental Arm

**eFigure 3.** Change in Absolute Lymphocyte Count Across Both Study Arms

**eFigure 4.** Change in Absolute Lymphocyte Count According to Treatment Response

**eFigure 5.** Change in Absolute Lymphocyte Count in the Experimental Arm According to Location of Irradiated Target

**eFigure 6.** Landmark Analysis of Overall Survival Stratified by SBRT Response

This supplemental material has been provided by the authors to give readers additional information about their work.

**eTable 1. Overview of Disease Burden at Baseline**

|                                         | Control arm (n=51) | Experimental arm (n=45) |
|-----------------------------------------|--------------------|-------------------------|
| Number of lesions                       |                    |                         |
| ≤3                                      | 14 (27%)           | 10 (22%)                |
| 4-5                                     | 6 (12%)            | 7 (16%)                 |
| 6-10                                    | 12 (24%)           | 11 (24%)                |
| >10                                     | 19 (37%)           | 17 (38%)                |
| Number of organ systems involved        |                    |                         |
| 1                                       | 11 (22%)           | 14 (31%)                |
| 2                                       | 21 (41%)           | 18 (40%)                |
| 3                                       | 8 (16%)            | 8 (18%)                 |
| >3                                      | 11 (22%)           | 5 (11%)                 |
| Organ systems involved                  |                    |                         |
| Lymph node(s)                           | 38 (75%)           | 29 (64%)                |
| Lung                                    | 25 (49%)           | 20 (44%)                |
| Liver                                   | 10 (20%)           | 9 (20%)                 |
| Bone                                    | 16 (31%)           | 11 (24%)                |
| Other*                                  | 31 (61%)           | 24 (53%)                |
| Proportion of lesions treated with SBRT |                    |                         |
| <25%                                    | NA                 | 25 (55%)                |
| 25-50%                                  |                    | 12 (27%)                |
| 100%                                    |                    | 8 (18%)                 |

Data are n (%).

\* Other affected organ systems include the adrenal gland (n=3), kidney (n=1), pancreas (n=1), peritoneum (n=3), pleura (n=1), urinary tract (n=6), (sub)cutis (n=2), muscle (n=3) and mucosa (n=7).

### eFigure 1. Subgroup Analysis of Progression-free Survival

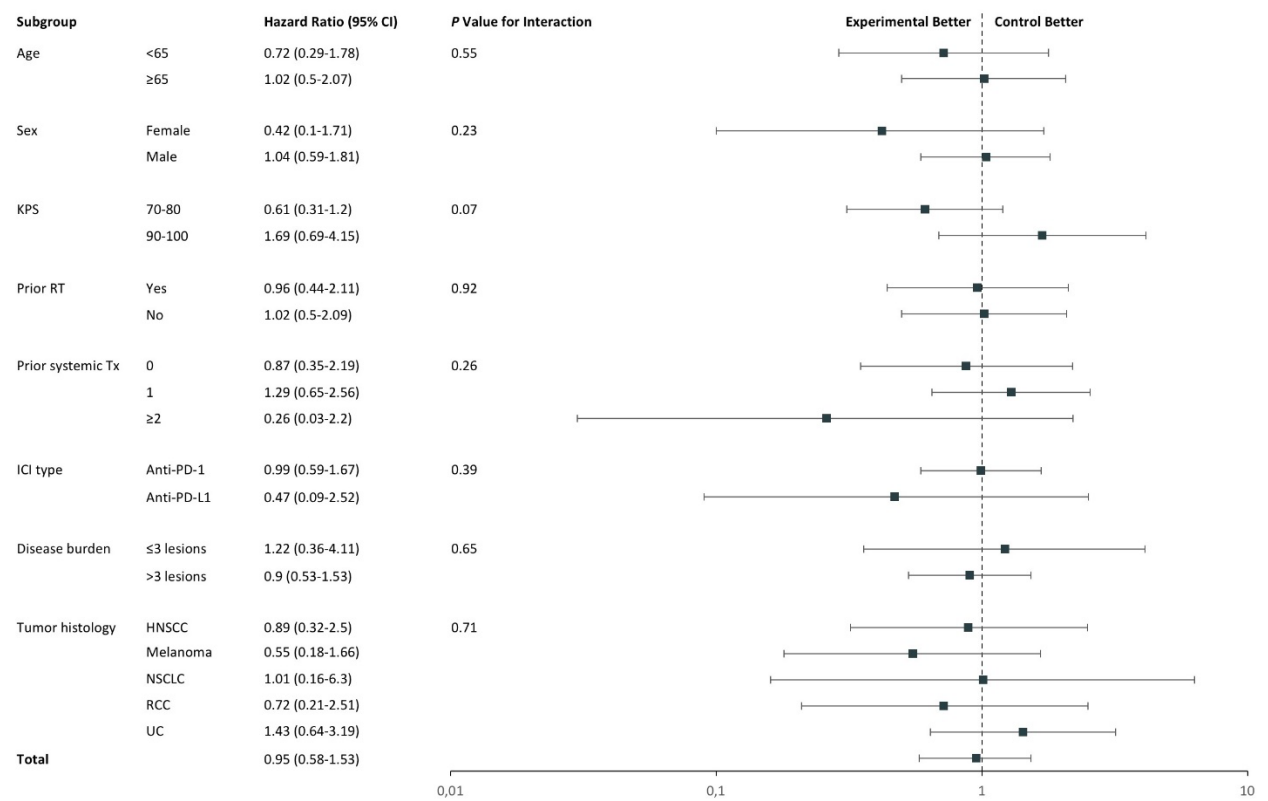

HNSCC=head and neck squamous cell carcinoma. ICI=immune checkpoint inhibitor. KPS=Karnofsky performance score. NSCLC=non-small cell lung carcinoma. RCC=renal cell carcinoma. RT=radiotherapy. Tx=treatment. UC=urothelial carcinoma.

P-values and confidence intervals are not adjusted for multiple testing. The p-value for interaction is based on a Chi-squared test (Anova).

## eFigure 2. Subgroup Analysis of Overall Survival

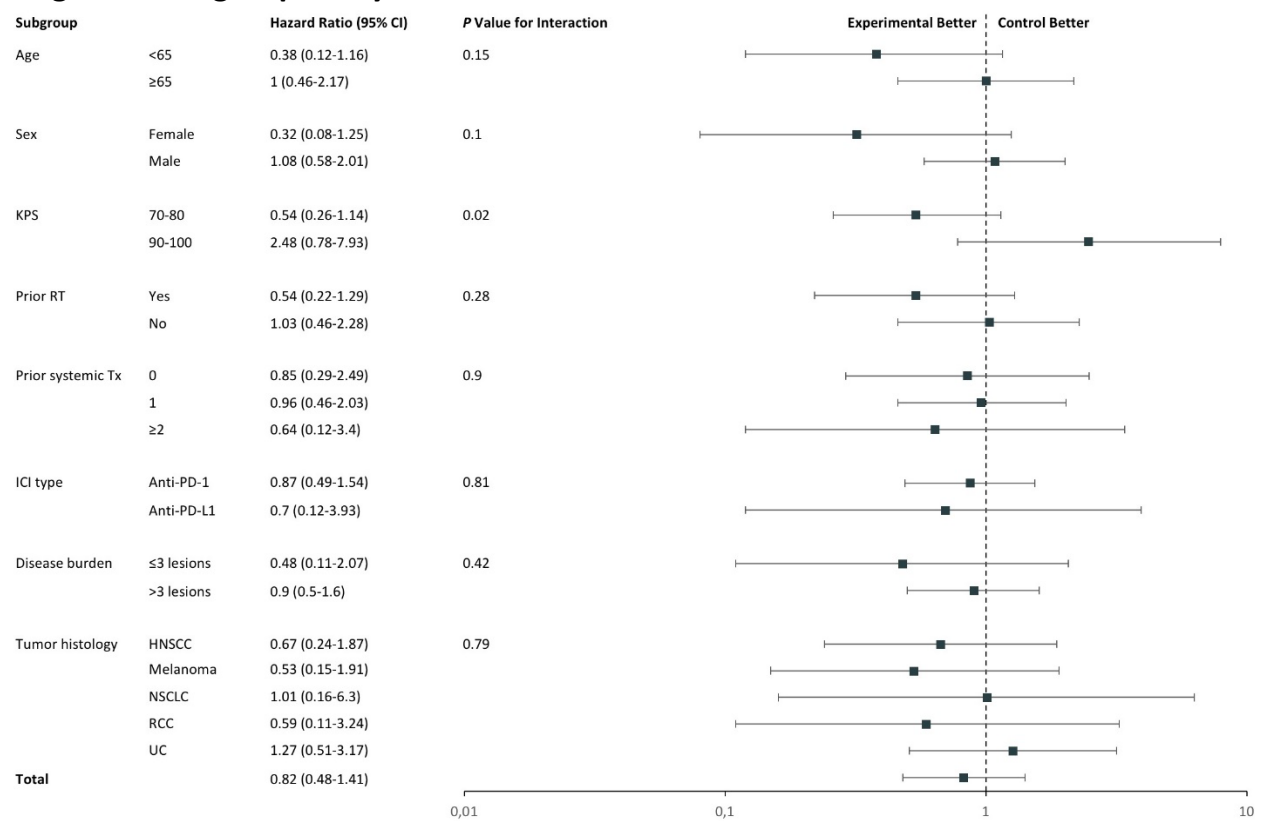

HNSCC=head and neck squamous cell carcinoma. ICI=immune checkpoint inhibitor. KPS=Karnofsky performance score. NSCLC=non-small cell lung carcinoma. RCC=renal cell carcinoma. RT=radiotherapy. Tx=treatment. UC=urothelial carcinoma.

P-values and confidence intervals are not adjusted for multiple testing. The p-value for interaction is based on a Chi-squared test (Anova).

**eTable 2. Subgroup Analysis of Disease Burden and Radiation Targets in the Experimental Arm**

| <b>Variable</b>                     | <b>PFS HR* (95% CI)</b>       | <b>OS HR* (95% CI)</b>        |
|-------------------------------------|-------------------------------|-------------------------------|
| Log(total number of lesions)        | 1.84 (1.17-2.90) <sup>†</sup> | 3.91 (1.94-7.90) <sup>‡</sup> |
| Number of lesions treated with SBRT | 0.71 (0.46-1.09)              | 0.31 (0.15-0.65) <sup>†</sup> |

\* A Cox proportional-hazards model, stratified for tumor histology, was used to calculate hazard ratios (HR) for progression-free (PFS) and overall survival (OS).

<sup>†</sup> p<0.01

<sup>‡</sup> p<0.001

**eFigure 3. Change in Absolute Lymphocyte Count Across Both Study Arms**

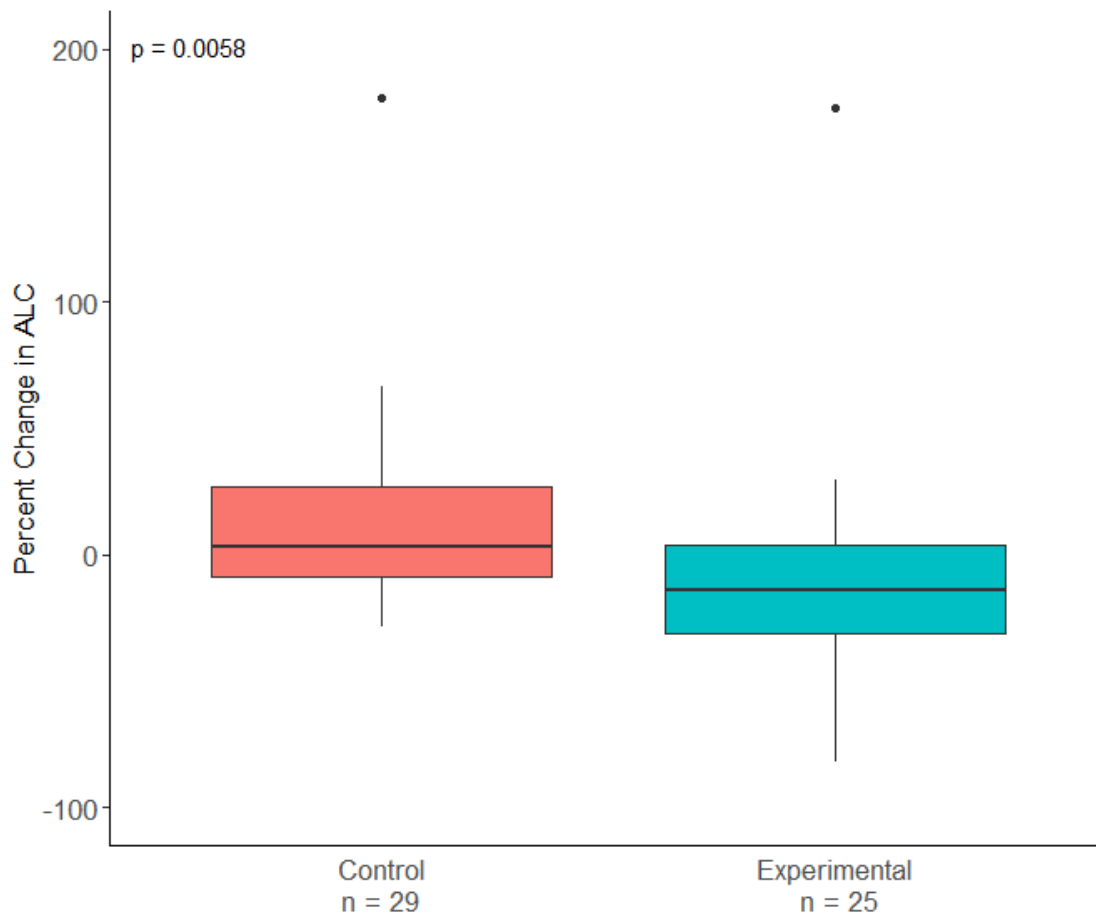

**eFigure 4. Change in Absolute Lymphocyte Count According to Treatment Response**

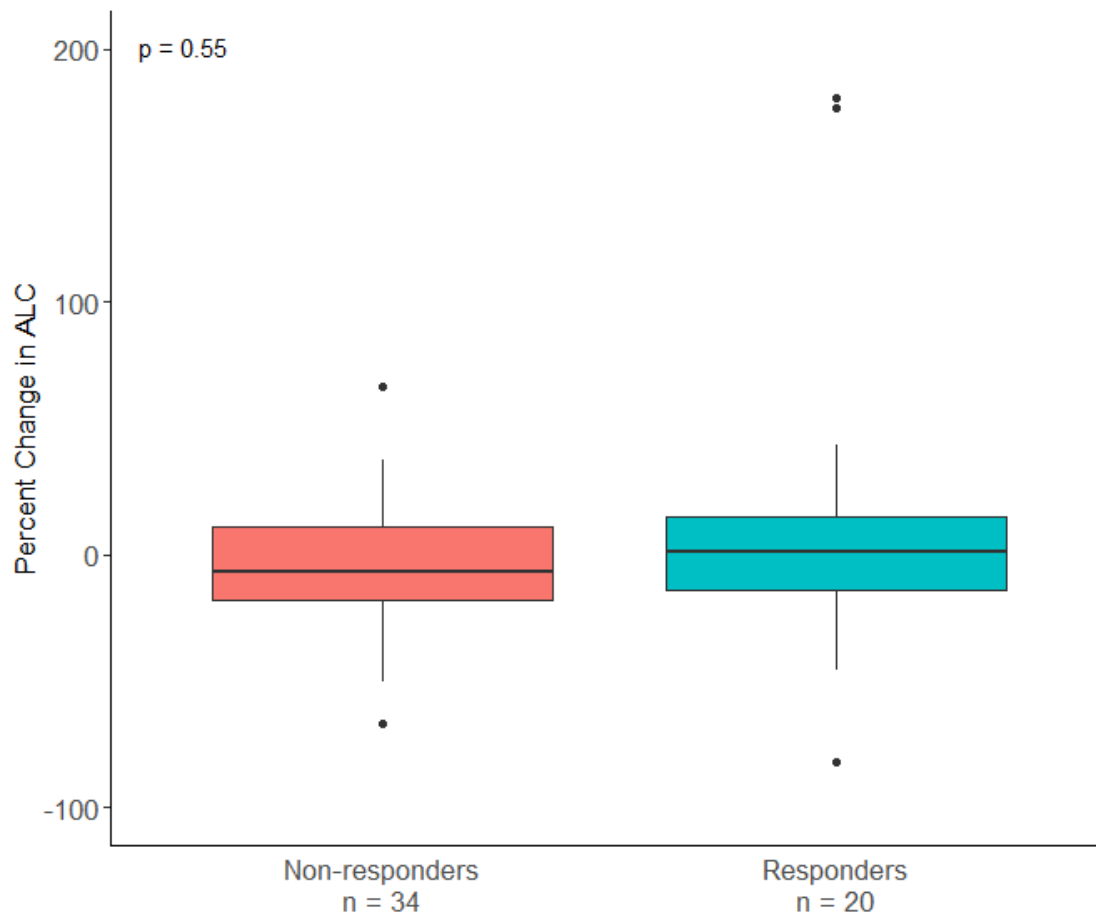

**eFigure 5. Change in Absolute Lymphocyte Count in the Experimental Arm According to Location of Irradiated Target**

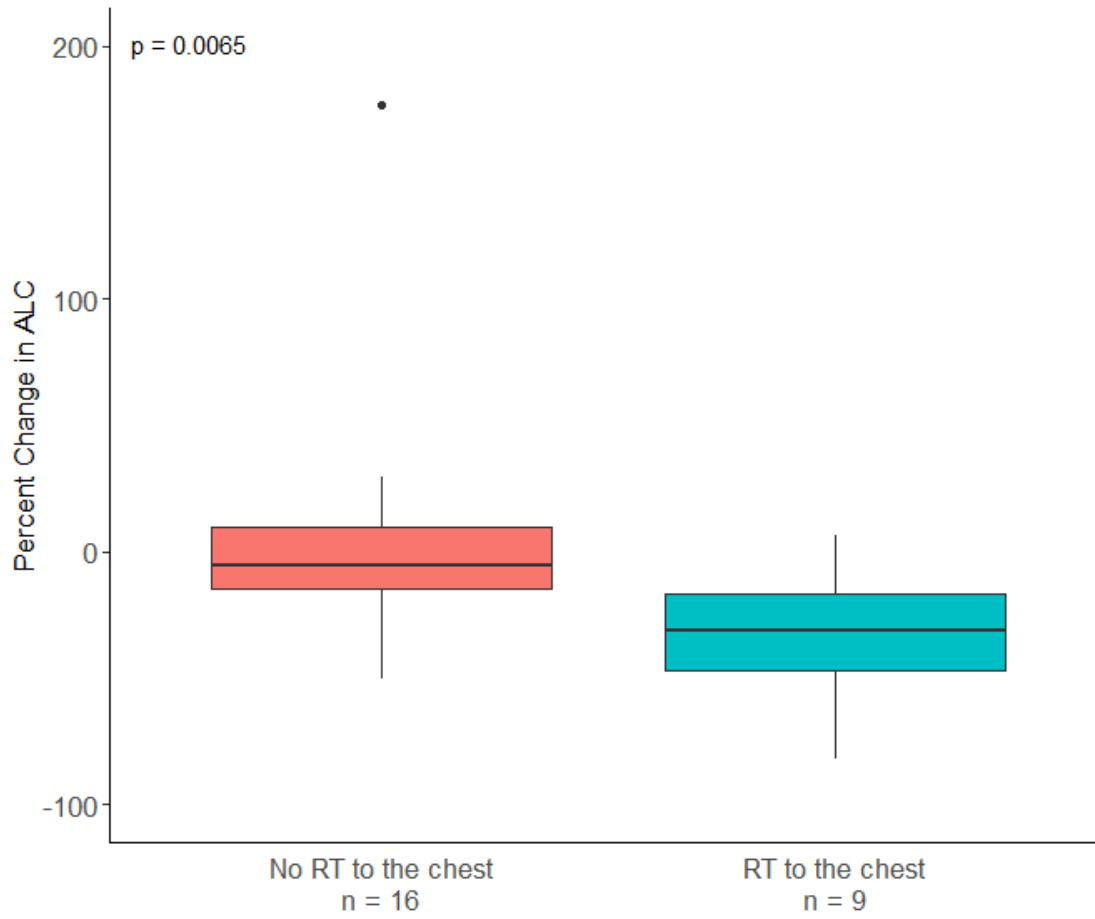



eFigure 6. Landmark Analysis of Overall Survival Stratified by SBRT Response

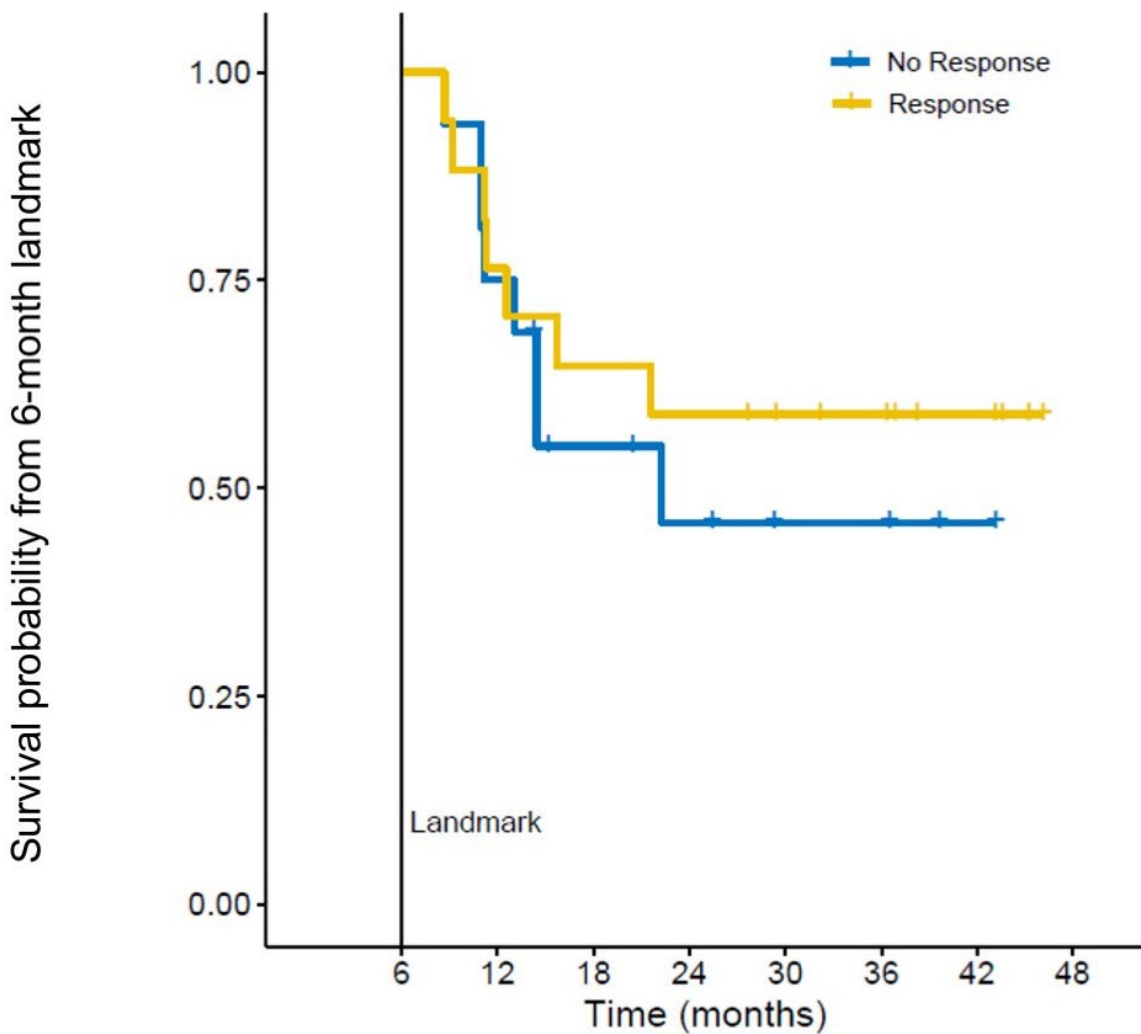

No. of patients at risk

| Strata      | 6  | 12 | 18 | 24 | 30 | 36 | 42 | 48 |
|-------------|----|----|----|----|----|----|----|----|
| No Response | 16 | 12 | 7  | 5  | 3  | 3  | 1  | 0  |
| Response    | 17 | 13 | 11 | 10 | 8  | 7  | 4  | 0  |
