# Supplementary material
Source: PubMed Central journal article supplement (PMC10326732)
Supplement: jamaoncol-e232132-s003.pdf [file jamaoncol-e232132-s003.pdf]

## Data Sharing Statement

Spaas. Checkpoint Inhibitors in Combination With Stereotactic Body Radiotherapy in Patients With Advanced Solid Tumors. *JAMA Oncol*. Published July 06, 2023.

doi:10.1001/jamaoncol.2023.2132

### Data

**Data available:** No

**Additional Information:** The study protocol of the CHEERS trial is published elsewhere. All other data, including study participant data, the data dictionary, and informed consent, will not be shared.
